# Supplementary material for: An Exploration of Evolution, Maturation, Expression and Function Relationships in Mir-23∼27∼24 Cluster
Source: PLoS One. 2014 Aug 26;9(8):e106223. doi: 10.1371/journal.pone.0106223 (PMC4144971; doi:10.1371/journal.pone.0106223)
Supplement: Table S3 — Functional enrichment results based on human miRNAs. (XLS) [file pone.0106223.s007.xls]

## Sheet: miR-23ab
GO	GO Term	Count	p-Value	Input Symbol
biological process	GO:0006355 regulation of transcription, DNA-dependent	84	2.79629e-82	ZNF138;PNRC2;ZBTB34;LIN54;SATB1;ZNF793;SETD8;ZBTB44;KLF3;VGLL3;ZNF292;PRDM10;ZFHX4;ZNF654;MTF1;CGGBP1;HEXIM1;MEF2C;ZNF420;MET;ZNF395;CCNH;ZNF655;ZNF287;SIX4;MAF;ELF4;PRDM1;PAX9;MEIS1;EBF3;FOXP2;CAMTA1;WASL;NCOA6;SAFB;ARNT2;ADNP;C2orf3;ZMYM2;CBFA2T3;SATB2;NFIB;PBRM1;ASF1A;EGR3;RUNX1T1;SAFB2;PNRC1;HOXD10;LIN28B;HOXB5;ZNF280C;MEIS2;CTNNBIP1;HOXA3;CREBBP;SMAD5;IRF2;HMGN2;DMBX1;HOXB4;JMJD2A;EPAS1;LHX4…
	GO:0006350 transcription	64	7.95788e-53	ZNF138;PNRC2;ZBTB34;BRWD1;LIN54;ZNF793;SETD8;HNF4G;ZBTB44;KLF3;CTCF;ZNF292;PRDM10;ZNF654;MTF1;MTF1;CGGBP1;HEXIM1;MEF2C;ZNF420;MDFIC;MET;ZNF395;CCNH;ZNF655;ELF4;PRDM1;ESRRG;FOXP2;CAMTA1;WASL;NCOA6;SAFB;ELF2;ADNP;ZMYM2;CBFA2T3;NFIB;PBRM1;ASF1A;EGR3;RUNX1T1;SAFB2;PNRC1;ZNF280C;SMAD5;PURB;IRF2;JMJD2A;BAZ2B;MIER1;TRPS1;RBL2;ZNF274;HIC1;FOXK1;ZNF267;CCNT2;ELF5;JMJD1C;ZNF238;ZNF697;FAM130A1;ZNF652
	GO:0007165 signal transduction	52	1.52514e-31	PDE4B;ERBB4;ARHGAP20;CSNK1G3;CXCL12;PPP2R5E;ICK;PTGER4;MTSS1;FAS;CNR1;TXNRD1;ITGAL;TNFAIP6;ODZ4;CCL7;PRKRIR;SHB;ADRA2A;LPAR1;CHL1;SNX27;KITLG;STAT5B;ODZ1;RCN1;RAP2B;ARNT2;NCOA1;CCK;CCK;PAK2;PAK2;LRP5;GPRC5B;CTNNBIP1;CREBBP;FGF2;FGF2;SMAD5;EDARADD;FNIP1;AKAP12;SPOCK1;EPAS1;PTPN11;ACVR2B;TRIM63;PLAU;STK4;DLG2;ERBB2IP
	GO:0007275 development	41	1.08623e-27	SEMA6D;KLF3;ERBB4;AMBRA1;MTF1;ICK;MET;SIX4;SHB;PAX9;CHL1;MEIS1;GCNT2;EBF3;ENC1;SHROOM2;ROBO2;FZD5;FZD4;SEMA4B;MAB21L2;FZD7;LRP5;HOXD10;HOXB5;CTNNBIP1;HOXA3;FGF2;SPRY2;DMBX1;EDARADD;HOXB4;SPOCK1;EPAS1;HIC1;DLX1;FOXK1;FOXO4;PRTG;ZNF267;ZIC5
	GO:0006810 transport	24	6.1105e-11	TMED5;SYT4;SLC1A1;SLC25A36;SLC16A6;TXNRD1;FMR1;PCLO;BICD2;MAGOHB;SLC7A1;NDUFA3;SLC1A3;M6PR;G3BP2;VCP;ABCA1;SLC25A4;ZNF238;MADD;MADD;MADD;TMED7;NCBP1
	GO:0007155 cell adhesion	22	3.26901e-20	PKP4;NLGN4X;CXCL12;NLGN4Y;LPP;MTSS1;CNR1;ITGAL;TNFAIP6;CHL1;KITLG;PCDH19;PCDH19;ACTN2;NRXN3;NRXN3;CHST10;ARSB;SPOCK1;NEGR1;DCBLD2;ERBB2IP
	GO:0006468 protein amino acid phosphorylation	19	2.12578e-17	ERBB4;CSNK1G3;MAP3K1;ICK;TLK1;TRIB1;VRK3;STK32A;NUAK2;WNK1;ACVR1C;CCK;PAK2;ACVR2B;NUAK1;PAK6;NEK6;MAP4K4;SRPK1
	GO:0007399 nervous system development	18	8.7274e-15	SEMA6D;APAF1;ERBB4;AMBRA1;MTF1;MEF2C;CNR1;IGSF8;CHL1;ODZ1;ENC1;SEMA4B;MAB21L2;FGF2;FGF2;DYRK1A;SPOCK1;ZIC5
	GO:0019941 modification-dependent protein catabolism	17	2.10363e-16	NEDD4;TNFAIP3;UBE2R2;ENC1;SPSB4;PJA1;OTUB1;RAD23B;TRIM63;VCP;FBXO33;ASB15;SPOPL;XIAP;SOCS6;ZYG11B;UBE2O
	GO:0030154 cell differentiation	17	1.92944e-10	SEMA6D;AMBRA1;MTF1;SHB;CHL1;ROBO2;CBFA2T3;ACVR1C;SEMA4B;ZIC1;EDARADD;EPAS1;MDFI;FOXK1;FOXO4;ZIC5;SRPK1
	GO:0007049 cell cycle	16	3.33164e-12	SETD8;C13orf34;TLK1;CCNH;CHL1;EBF3;CDC23;CCNG1;MAPRE1;PARD6B;FOXO4;NEK6;CCNT2;PPP1CB;FAM29A;ERBB2IP
	GO:0045944 positive regulation of transcription from RNA polymerase II promoter	14	1.48573e-17	PPARGC1A;MTF1;CCNH;ELF4;PKNOX1;PAX9;STAT5B;NCOA6;ARNT2;NCOA1;NKX2-1;HOXD10;EPAS1;FAM130A1
	GO:0006811 ion transport	14	4.16937e-11	MTF1;CACNA2D3;ATP6V1E1;ATP11B;SLC38A1;SLC12A2;KCNK5;KCNIP4;WNK1;LASP1;KCNK3;SCN2A;TMEM16D;ATP6V1B2
	GO:0008283 cell proliferation	14	5.36676e-10	ERBB4;IGSF8;PROK2;TUSC2;VTI1B;MAPRE1;CBFA2T3;CTNNBIP1;IRF2;HOXB4;SPOCK1;EPS15;ELF5;TGFA
	GO:0015031 protein transport	13	9.59419e-10	RAB8B;NUP50;MCFD2;POM121C;SNX27;SEH1L;SYS1;HSP90B1;EPS15;RAB39B;SNX5;RAB11FIP2;BET1
	GO:0008284 positive regulation of cell proliferation	12	2.42244e-13	CUL3;ADRA2A;CHL1;KITLG;STAT5B;MARCKSL1;PRDX3;MAB21L2;LRP5;HOXA3;BTBD14A;BTBD14B
	GO:0007186 G-protein coupled receptor protein signaling pathway	12	3.80349e-07	CXCL12;PTGER4;CALCR;ADRA2A;LPAR1;LANCL1;FZD5;FZD4;FZD7;GPRC5B;AKAP12;ABCA1
	GO:0000122 negative regulation of transcription from RNA polymerase II promoter	11	3.66606e-14	SATB1;CTCF;HEXIM1;PRDM1;PKIA;MEIS2;CTNNBIP1;IRF2;HOXB4;MDFI;ZNF238
	GO:0051301 cell division	11	1.0711e-12	SETD8;C13orf34;EBF3;CDC23;CCNG1;MAPRE1;PARD6B;NEK6;CCNT2;PPP1CB;FAM29A
	GO:0044419 interspecies interaction between organisms	10	1.83427e-10	MDFIC;TNPO1;PAK2;CREBBP;PRMT6;CPSF4;JMJD2A;CCNT2;SLC25A4;BNIP3L
	GO:0055114 oxidation reduction	10	1.10199e-07	IYD;ALDH1A2;FAS;MGC4172;PRDX3;C5orf4;JMJD2A;DLD;UTX;JMJD1C
	GO:0006955 immune response	10	3.13718e-06	CXCL12;PTGER4;FAS;CHUK;CCL7;ODZ1;OTUB1;CTSC;TGFBR3;BTLA
	GO:0006508 proteolysis	10	1.34266e-05	CASP7;CPD;DLD;CTSC;PLAU;ADAM19;PRSS35;ADAMTS5;NPEPPS;NPEPPS
cellular component	GO:0005634 nucleus	213	1.38001e-231	ZNF138;PNRC2;ZBTB34;ZIC4;BRWD1;DEPDC1;MRC1L1;MRC1;TOP1;LIN54;SATB1;ZNF793;RUFY2;SETD8;HNF4G;TMPO;TMPO;ZBTB44;KLF3;MYCT1;NUP50;REPS2;NLGN4X;VGLL3;NUFIP2;CTCF;OSBPL8;HELZ;ZNF292;NAP1L5;KPNA4;PRDM10;ZFHX4;PPARGC1A;ZNF654;MTF1;MTF1;NLGN4Y;DCP2;CGGBP1;HEXIM1;RCHY1;CEP350;ICK;MEF2C;TOX;ZNF420;TNKS2;MDFIC;LPP;CUL3;MET;MET;ZNF395;CFL2;TLK1;TNFAIP3;CCNH;TMOD1;PNMA2;CHUK;WBP4;TNRC6B;TXNRD1;AUTS2;ZNF655;FMR…
	GO:0005737 cytoplasm	173	4.05365e-146	SEMA6D;PDE4B;BRWD1;APAF1;ETNK1;MRC1L1;MRC1;TOP1;TNRC6A;HNF4G;SEC23IP;REPS2;PPP1R12A;NUFIP2;OSBPL8;MAP7;AMBRA1;CSNK1G3;SEC24A;KPNA4;ZFHX4;DCP2;HEXIM1;RCHY1;DOCK3;PPP2R5E;ICK;NEDD4;TNKS2;MDFIC;LPP;ZNF395;ALDH1A2;CFL2;TGFBR2;TNFAIP3;MTSS1;TMOD1;GOLPH3L;FAS;CHUK;BNIP2;TNRC6B;TXNRD1;AUTS2;CRLF3;FMR1;ANKHD1;TRMT5;TRIB1;TJP1;SHB;YES1;ACO1;KIAA1737;MYH1;PKNOX1;CA2;SSH2;SNX27;KITLG;MARCKS;TNPO1;STAT5B;RCN…
	GO:0016020 membrane	114	8.36501e-74	FUT9;KIAA1467;TMED5;KIAA0644;MRC1L1;SYT4;C3orf52;TMPO;ERBB4;SEC23IP;ATP11C;SLC6A14;NUP50;NLGN4X;HS6ST3;PTPRB;SEC24A;SLC1A1;NLGN4Y;CACNA2D3;FUT4;LRAT;TNKS2;STX12;ATP11B;MET;HS6ST2;SLC25A36;C3orf57;GOLPH3L;B3GNT1;B3GNT1;PRRG1;IGSF8;ODZ4;ADCY1;GALNT12;IL21R;SEC14L1;TMEM2;LRIG1;POM121C;SLC12A2;C12orf23;TMEM194A;PIP5K3;GCNT2;MARCKS;ODZ1;ORMDL1;IL12B;PCLO;PUNC;KIAA0922;LIPH;LANCL1;KCNK5;VTI1B;BLCAP;LHF…
	GO:0016021 integral to membrane	100	4.48374e-71	FUT9;SEMA6D;KIAA1467;TMED5;KIAA0644;MRC1L1;SYT4;C3orf52;TMPO;VAPA;ATP11C;HS6ST3;NLGN4Y;CACNA2D3;FUT4;LRAT;PTGER4;IYD;STX12;ATP11B;HS6ST2;SLC25A36;C3orf57;CLDN12;FAS;B3GNT1;B3GNT1;ITGAL;IGSF8;ODZ4;ADCY1;GALNT12;IL21R;SLC38A1;TMEM2;LRIG1;LPHN2;POM121C;C12orf23;TMEM194A;CHL1;KITLG;GCNT2;ORMDL1;PCDH19;PCDH19;PUNC;KIAA0922;GPR126;VTI1B;BLCAP;LHFPL2;PGRMC2;ROBO2;NRXN3;ACVR1C;CHST10;C5orf4;FZD4;SEMA4B;E…
	GO:0005886 plasma membrane	73	5.87731e-54	SEMA6D;MRC1;RAB8B;VAPA;MAP7;MTF1;PTGER4;IYD;NEDD4;LPP;CALCR;TGFBR2;CLDN12;SLC16A6;FAS;PIP4K2B;SLC4A4;CNR1;CNR1;CRLF3;ITGAL;TJP1;SLC38A1;SHB;ADRA2A;LPHN2;RRAS2;LPAR1;CHL1;KITLG;MARCKSL1;ATRN;PCDH19;PCDH19;RAP2B;GPR126;KCNIP4;SHROOM2;FZD5;PARD6B;PDPK1;FZD7;SLC36A2;PTP4A2;GPRC5B;SLC1A3;SPRY2;MTM1;RAP1A;ERLIN2;CPD;FNIP1;AKAP12;GPR64;ACVR2B;NEGR1;VSTM3;PLAU;TJP2;EPS15;PIP3-E;TGFBR3;RAPGEF2;UBL3;RAB39B…
	GO:0005622 intracellular	62	9.18336e-17	ZNF138;ZBTB34;ZIC4;APAF1;DEPDC1;ZNF793;ZBTB44;KLF3;ARHGAP20;CTCF;ZNF292;PRDM10;ZFHX4;ZNF654;MTF1;NEDD4;ZNF420;MAP3K7IP3;ZNF395;CFL2;TBC1D12;ZNF655;ZNF287;PRDM1;RRAS2;ZNF839;C6orf62;TBC1D9;FOXP2;IPPK;RAP2B;ADNP;NFIB;CCK;RPIA;PAK2;EGR3;ZNF280C;ZIC1;OLA1;SMAD5;ZHX1;RAP1A;G3BP2;FNIP1;ARHGEF6;TRIM63;TRPS1;ZNF274;HIC1;RAPGEF2;PROSC;ZNF267;UBL3;XIAP;RAB39B;ZIC5;JMJD1C;ZNF238;ZNF697;DIRAS2;ZNF652
	GO:0005887 integral to plasma membrane	38	5.58103e-36	MRC1;ERBB4;SLC6A14;NLGN4X;PTPRB;SLC1A1;MTF1;MET;CALCR;SLC16A6;SLC4A4;CNR1;CNR1;PRRG1;ADRA2A;LPAR1;SLC12A2;ODZ1;ATRN;LAMP1;LANCL1;KCNK5;NRXN3;FZD5;SLC7A1;CAPRIN1;M6PR;HAS2;GPR64;ACVR2B;KCNK3;DCBLD2;TGFBR3;RAPGEF2;ABCA1;CALCRL;DLG2;SLC25A4
	GO:0005794 Golgi apparatus	37	4.72242e-40	FUT9;PDE4B;MRC1L1;MRC1;SEC24A;FUT4;TNKS2;STX12;CUL3;GOLPH3L;FAS;B3GNT1;B3GNT1;TNRC6B;GALNT12;SEC14L1;MCFD2;ACO1;GCNT2;BICD2;VTI1B;MAPRE1;CBFA2T3;FZD5;CHST10;B3GALT2;NDFIP2;WHDC1;SYS1;GLCE;CHST7;CHST3;COG3;ST8SIA1;TRAPPC6B;TPST1;BET1
	GO:0005576 extracellular region	33	9.17135e-22	C2orf69;CRISPLD1;COL4A4;CXCL12;MTF1;FAS;PRRG1;CCL7;MCFD2;PROK2;CHL1;KITLG;ODZ1;C12orf49;IL12B;ATRN;LIPH;LIPH;MGC4172;CCK;C3orf64;FGF2;FBN2;ARSB;SPOCK1;COL4A1;PLAU;TGFBR3;IL6R;PRSS35;UACA;ADAMTS5;TGFA
	GO:0005829 cytosol	32	3.93707e-31	APAF1;MAP3K1;NEDD4;TGFBR2;FAS;FAS;CHUK;TXNRD1;KIAA1303;ACO1;SH3BGR;CDC23;CCK;RPIA;PDPK1;PAK2;PTEN;CASP7;SMAD5;SPRY2;RAP1A;RAD23B;HSP90B1;PTPN11;VCP;EPS15;FOXO4;PFKFB4;XIAP;NPEPPS;NCBP1;UBE2D1
	GO:0005783 endoplasmic reticulum	31	2.07614e-30	KIAA1467;TMED5;C3orf52;VAPA;SEC23IP;SEC24A;LRAT;PIP4K2B;MCFD2;RRAS2;POM121C;ACO1;ORMDL1;RCN1;C3orf64;C5orf4;ELOVL3;NDFIP2;STX17;ERLIN2;ELOVL2;HSP90B1;VCP;GCS1;TRAPPC6B;ENTPD5;AGPAT9;BNIP3L;TMED7;BET1;SET
	GO:0005730 nucleolus	26	8.94152e-30	MRC1L1;MRC1;TOP1;HNF4G;REPS2;OSBPL8;ZFHX4;FMR1;TRMT5;INTS6;MYH1;CHL1;ACTN2;WASL;NCOA6;ADNP;NFIB;HMGB2;MEIS2;PJA1;STX17;THAP2;JMJD2A;ZNF274;CCNT2;NOL4
	GO:0005739 mitochondrion	24	7.1808e-20	SLC6A14;ACSS3;PPIF;PPM1K;SLC25A36;PRDX3;RAI14;CTAGE5;LRP5;ISCA2;NDUFA3;NDFIP2;REEP1;CS;DLD;PHF16;GLS;GLS;AUH;SLC25A4;BNIP3L;MADD;MADD;MADD
	GO:0005856 cytoskeleton	20	9.86016e-14	CFL2;TMOD1;INTS6;SSH2;KITLG;DNM3;PCLO;ACTN2;ENC1;BICD2;SHROOM2;CNN2;RAI14;CCDC6;JAK1;AKAP12;LASP1;LMOD3;FAM29A;UACA
	GO:0005624 membrane fraction	19	4.48937e-18	VAPA;SLC1A1;FUT4;PPIF;NEDD4;MET;SLC16A6;SLC38A1;YES1;SLC12A2;GCNT2;LAMP1;CHST10;SLC1A3;CPD;GCS1;ABCA1;TPST1;DLG2
	GO:0000139 Golgi membrane	18	1.0421e-20	SEC24A;TNKS2;B3GNT1;B3GNT1;GALNT12;GCNT2;CBFA2T3;FZD5;CHST10;B3GALT2;NDFIP2;SYS1;GLCE;CHST7;CHST3;ST8SIA1;TPST1;BET1
	GO:0005789 endoplasmic reticulum membrane	16	3.09267e-15	TMED5;C3orf52;SEC24A;LRAT;PIP4K2B;POM121C;ORMDL1;ELOVL3;CASP7;ERLIN2;ELOVL2;HSP90B1;GCS1;AGPAT9;TMED7;BET1
	GO:0005654 nucleoplasm	12	4.42508e-09	TOP1;NUP50;MET;CCNH;FMR1;CDC23;NKX2-1;SMAD5;RAD23B;CCNT2;NCBP1;UBE2D1
	GO:0009986 cell surface	11	3.18844e-13	NLGN4X;FUT4;HNRNPU;ROBO2;SLC1A3;M6PR;ACVR2B;VSTM3;DCBLD2;DLG2;TGFA
	GO:0005874 microtubule	10	1.37432e-11	VAPA;MAP7;NIN;MAP4;EBF3;DNM3;SHROOM2;MAPRE1;SPRY2;TRIM63
	GO:0005615 extracellular space	10	5.16499e-08	CXCL12;CCL7;KITLG;ATRN;LIPH;ADNP;FGF2;ARSB;TGFBR3;TGFA
molecular function	GO:0005515 protein binding	203	1.03705e-183	ZBTB34;BRWD1;APAF1;KIAA0644;INTU;SYT4;TOP1;PKP4;RAB8B;SETD8;VAPA;ZBTB44;ERBB4;SEC23IP;NUP50;REPS2;PPP1R12A;NUFIP2;CTCF;PTPRB;NAP1L5;SEC24A;KPNA4;MTF1;NLGN4Y;DCP2;NIN;HEXIM1;RCHY1;DOCK3;PPP2R5E;ATP6V1E1;KLHL28;MAP3K7IP3;LPP;CUL3;MET;CFL2;TLK1;TNFAIP3;CCNH;FAS;PNMA2;BNIP2;WBP4;CNR1;ZNF655;FMR1;ANKHD1;TNFAIP6;IGSF8;LONRF2;SHB;ELF4;ADRA2A;LRIG1;INTS6;YES1;RRAS2;ESRRG;CCDC82;VRK3;PKNOX1;PIP5K3;CHL1;SN…
	GO:0046872 metal ion binding	86	3.9975e-65	ZNF138;ZBTB34;ZIC4;ZNF793;RUFY2;HNF4G;ZBTB44;KLF3;SEC23IP;CTCF;HELZ;ZNF292;PRDM10;ZFHX4;ZNF654;MTF1;MTF1;MTF1;DCP2;RCHY1;ZDBF2;ZNF420;ZC3H12C;MAP3K7IP3;LPP;ZNF395;TNFAIP3;WBP4;ZNF655;ZNF287;LONRF2;PRKRIR;PRDM1;ESRRG;ZNF839;ACO1;PIP5K3;CA2;EBF3;FOXP2;ADNP;ZMYM2;CBFA2T3;EGR3;RUNX1T1;ISCA2;LIN28B;ZNF280C;ZIC1;MEX3C;PJA1;CREBBP;ZHX1;KIAA1166;JHDM1D;CPSF4;CPD;CBFA2T2;THAP2;JMJD2A;LASP1;TRIM63;LHX4;BAZ…
	GO:0008270 zinc ion binding	83	2.00418e-81	ZNF138;ZBTB34;ZIC4;ZNF793;RUFY2;HNF4G;ZBTB44;KLF3;CTCF;HELZ;ZNF292;MAP3K1;SEC24A;PRDM10;ZFHX4;ZNF654;MTF1;MTF1;MTF1;RCHY1;ZDBF2;ZNF420;ZC3H12C;MAP3K7IP3;LPP;ZNF395;TNFAIP3;FAS;WBP4;ZNF655;ZNF287;LONRF2;PRKRIR;PRDM1;ESRRG;ZNF839;PIP5K3;CA2;EBF3;FOXP2;PCLO;ADNP;ZMYM2;CBFA2T3;EGR3;RUNX1T1;LIN28B;ZNF280C;ZIC1;MEX3C;PJA1;CREBBP;ZHX1;KIAA1166;JHDM1D;CPSF4;CPD;CBFA2T2;THAP2;JMJD2A;LASP1;TRIM63;LHX4;BAZ2…
	GO:0000166 nucleotide binding	70	1.86042e-67	APAF1;RAB8B;TNRC6A;ERBB4;ATP11C;RALYL;HELZ;RBM25;CSNK1G3;MAP3K1;PPARGC1A;NIN;ICK;ATP11B;MET;MET;TLK1;TGFBR2;PIP4K2B;CHUK;TNRC6B;BTAF1;SMC5;YES1;RRAS2;MYH1;VRK3;CHL1;STK32A;RBM35A;CPEB4;HNRNPU;NUAK2;DNM3;IPPK;RAP2B;SAFB;WNK1;ACVR1C;CCK;PDPK1;PAK2;PAK2;SAFB2;RBM12B;OLA1;MYO5C;RBPMS2;RAP1A;G3BP2;DYRK1A;JAK1;HSP90B1;ACVR2B;CPEB2;NUAK1;PAK6;VCP;DHX15;PFKFB4;ABCA1;NEK6;RAB39B;MYH4;MAP4K4;STK4;CUGBP2;SR…
	GO:0003700 transcription factor activity	56	2.68534e-67	ZNF138;SATB1;HNF4G;KLF3;CTCF;ZFHX4;MTF1;MTF1;MEF2C;ZNF287;BTAF1;SIX4;MAF;ELF4;PRDM1;ESRRG;MEIS1;STAT5B;RCN1;FOXP2;ELF2;ARNT2;ADNP;C2orf3;CBFA2T3;SATB2;NFIB;NKX2-1;EGR3;RUNX1T1;HMGB2;HOXD10;HOXB5;ZIC1;MEIS2;HOXA3;CREBBP;SMAD5;ZHX1;PURB;IRF2;DMBX1;HOXB4;CBFA2T2;LHX4;NKX3-2;TRPS1;ZNF274;HIC1;DLX1;FOXK1;FOXO4;CREBZF;ELF5;ZNF238;FAM130A1
	GO:0016740 transferase activity	51	8.94139e-47	ETNK1;SETD8;ERBB4;PTAR1;HS6ST3;CSNK1G3;MAP3K1;LRAT;ICK;MET;MET;HS6ST2;TLK1;TGFBR2;FAS;PIP4K2B;CHUK;TRMT5;YES1;VRK3;PIP5K3;STK32A;NUAK2;IPPK;WNK1;NCOA1;ACVR1C;CCK;PDPK1;CHST10;PAK2;PAK2;CREBBP;PRMT6;CS;DYRK1A;JAK1;ACVR2B;NUAK1;PAK6;TRDMT1;CHST7;CHST3;PFKFB4;NEK6;MAP4K4;STK4;TPST1;AGPAT9;SRPK1;MAP3K9
	GO:0005524 ATP binding	49	8.40444e-49	APAF1;ERBB4;ATP11C;HELZ;CSNK1G3;MAP3K1;ICK;ATP11B;MET;TLK1;TGFBR2;PIP4K2B;CHUK;TRIB1;BTAF1;SMC5;YES1;MYH1;VRK3;PIP5K3;CHL1;STK32A;HNRNPU;NUAK2;IPPK;WNK1;ACVR1C;CCK;PDPK1;PAK2;PAK2;OLA1;MYO5C;DYRK1A;JAK1;HSP90B1;ACVR2B;NUAK1;PAK6;VCP;DHX15;PFKFB4;ABCA1;NEK6;MYH4;MAP4K4;STK4;SRPK1;MAP3K9
	GO:0003677 DNA binding	39	2.27837e-26	ZBTB34;ZIC4;ZNF793;TMPO;TMPO;ZBTB44;ZNF292;PRDM10;PPARGC1A;ZNF654;CGGBP1;TOX;ZNF420;ZNF395;TNFAIP3;ZNF655;PRKRIR;PAX9;CHL1;EBF3;HNRNPU;SAFB;TOX3;NCOA1;PBRM1;SAFB2;LIN28B;ZNF280C;HMGN2;THAP2;BAZ2B;MIER1;RBL2;TRDMT1;ZNF267;LBR;ZIC5;ZNF697;ZNF652
	GO:0016787 hydrolase activity	35	8.42359e-23	PDE4B;ATP11C;HELZ;PTPRB;DCP2;PLCXD3;PPM1K;ATP6V1E1;ATP11B;DNAJC6;BTAF1;CHL1;SSH2;DNM3;LYPLA1;LIPH;LIPH;SYNJ1;PTEN;PTP4A2;OLA1;MTM1;ARSB;DUSP5;PTPN11;VCP;DHX15;PFKFB4;GLS;GLS;CNOT6L;NUDT21;PPP1CB;ENTPD5;ATP6V1B2
	GO:0043565 sequence-specific DNA binding	31	2.19304e-37	SATB1;HNF4G;ZFHX4;MEF2C;SIX4;MAF;ELF4;ESRRG;PKNOX1;MEIS1;FOXP2;ELF2;ADNP;SATB2;NKX2-1;HOXD10;HOXB5;MEIS2;HOXA3;ZHX1;DMBX1;HOXB4;EPAS1;LHX4;NKX3-2;TRPS1;DLX1;FOXK1;FOXO4;CREBZF;ELF5
	GO:0003723 RNA binding	29	8.45124e-31	TNRC6A;RALYL;NUFIP2;PPARGC1A;DCP2;MET;MET;ANKHD1;ACO1;CHL1;RBM47;RBM35A;CPEB4;HNRNPU;SAFB;MAGOHB;SYNJ1;SAFB2;RBM12B;MEX3C;CPSF4;G3BP2;HSP90B1;CPEB2;TRDMT1;AUH;CUGBP2;NUDT21;NOL4
	GO:0005509 calcium ion binding	28	3.81011e-26	MRC1;SYT4;REPS2;CACNA2D3;BNIP2;CNR1;PRRG1;ITGAL;GALNT12;MCFD2;TBC1D9;STAT5B;RCN1;PCDH19;PCDH19;PCLO;ACTN2;KCNIP4;NRXN3;FBN2;ARSB;SPOCK1;HSP90B1;EPS15;RAPGEF2;EFHA2;TMEM16D;ENTPD5
	GO:0004872 receptor activity	24	4.59282e-15	SEMA6D;MRC1L1;MRC1;ERBB4;PTGER4;MET;TGFBR2;CNR1;ITGAL;IL21R;ADRA2A;LPAR1;ATRN;PGRMC2;NRXN3;ACVR1C;SLC7A1;SEMA4B;LRP5;GPRC5B;ACVR2B;IL6R;LBR;BTLA
	GO:0004674 protein serine/threonine kinase activity	18	6.53977e-20	CSNK1G3;MAP3K1;TLK1;VRK3;STK32A;NUAK2;WNK1;ACVR1C;CCK;PAK2;DYRK1A;NUAK1;PAK6;NEK6;MAP4K4;STK4;SRPK1;MAP3K9
	GO:0000287 magnesium ion binding	18	1.1725e-19	ATP11C;MAP3K1;ICK;PPM1K;ATP11B;TGFBR2;ITGAL;ADCY1;STK32A;NUAK2;ACVR1C;PTEN;ACVR2B;NUAK1;NEK6;STK4;ENTPD5;SRPK1
	GO:0004871 signal transducer activity	17	1.95664e-07	VAPA;PPP1R12A;CXCL12;PLCXD3;STAT5B;IL12B;ARNT2;NCOA1;CCK;NDFIP2;CREBBP;EPAS1;TRIM63;MIER1;RAPGEF2;NEK6;TGFA
	GO:0008233 peptidase activity	13	2.72617e-11	TNFAIP3;USP30;CASP7;OTUB1;CPD;CTSC;PLAU;ADAM19;USP31;USP31;ADAMTS5;NPEPPS;NPEPPS
	GO:0016491 oxidoreductase activity	12	1.93854e-09	IYD;ALDH1A2;FAS;TXNRD1;MGC4172;PRDX3;C5orf4;JMJD2A;DLD;UTX;JMJD1C;MADD
	GO:0016757 transferase activity, transferring glycosyl groups	11	1.267e-12	FUT9;FUT4;TNKS2;B3GNT1;B3GNT1;GALNT12;GCNT2;C3orf64;B3GALT2;HAS2;GLT8D3
	GO:0003779 actin binding	11	9.34569e-12	CFL2;TMOD1;MYH1;SSH2;ACTN2;WASL;ENC1;CNN2;WHDC1;CPD;MYH4
	GO:0004930 G-protein coupled receptor activity	11	3.12138e-07	PTGER4;ADRA2A;LPHN2;LPAR1;LANCL1;GPR126;FZD5;FZD4;FZD7;GPRC5B;GPR64
	GO:0005525 GTP binding	10	7.5853e-10	RAB8B;NIN;DOCK3;RRAS2;DNM3;RAP2B;OLA1;RAP1A;RAB39B;DIRAS2
KEGG	Pathway	Count	p-Value	Input Symbol
	MAPK signaling pathway	16	8.57051e-10	MAP3K1;CACNA2D3;MEF2C;TGFBR2;FAS;CHUK;RRAS2;ACVR1C;PAK2;FGF2;FGF2;RAP1A;DUSP5;RAPGEF2;MAP4K4;STK4
	Regulation of actin cytoskeleton	15	2.87406e-10	PPP1R12A;CFL2;PIP4K2B;ITGAL;RRAS2;PIP5K3;SSH2;ACTN2;WASL;PAK2;FGF2;FGF2;ARHGEF6;PAK6;PPP1CB
	Focal adhesion	12	1.04762e-07	PPP1R12A;COL4A4;MET;ACTN2;PDPK1;PAK2;PTEN;RAP1A;PAK6;COL4A1;XIAP;PPP1CB
	Tight junction	10	1.47764e-07	VAPA;TJP1;YES1;RRAS2;MYH1;ACTN2;PARD6B;PTEN;TJP2;MYH4
	Ubiquitin mediated proteolysis	10	1.8134e-07	MAP3K1;RCHY1;NEDD4;CUL3;UBE2R2;CDC23;XIAP;UBE2K;UBE2O;UBE2D1
	Cytokine-cytokine receptor interaction	10	5.11013e-05	CXCL12;MET;TGFBR2;FAS;CCL7;IL21R;KITLG;IL12B;ACVR2B;IL6R
	Renal cell carcinoma	9	5.26924e-09	MET;ARNT2;PAK2;CREBBP;RAP1A;EPAS1;PTPN11;PAK6;TGFA
	Adherens junction	9	1.37757e-08	PTPRB;MET;TGFBR2;TJP1;YES1;ACTN2;WASL;ACVR1C;CREBBP
	Axon guidance	8	9.90022e-06	SEMA6D;CXCL12;MET;CFL2;ROBO2;PAK2;SEMA4B;PAK6
	Jak-STAT signaling pathway	8	3.53415e-05	IL21R;STAT5B;IL12B;CREBBP;SPRY2;JAK1;PTPN11;IL6R
	Glycosphingolipid biosynthesis - lactoseries	7	1.05036e-09	FUT9;FUT4;B3GNT1;B3GNT1;GCNT2;B3GALT2;ST8SIA1
	Wnt signaling pathway	7	0.000220478	PPP2R5E;FZD5;FZD4;FZD7;LRP5;CTNNBIP1;CREBBP
	Epithelial cell signaling in Helicobacter pylori infection	6	2.0015e-05	ATP6V1E1;MET;CHUK;TJP1;PTPN11;ATP6V1B2
	Pancreatic cancer	6	2.54742e-05	TGFBR2;CHUK;ACVR1C;JAK1;ARHGEF6;TGFA
	Colorectal cancer	6	5.6554e-05	MET;TGFBR2;ACVR1C;FZD5;FZD4;FZD7
	Small cell lung cancer	6	6.45529e-05	APAF1;COL4A4;CHUK;PTEN;COL4A1;XIAP
	TGF-beta signaling pathway	6	6.88774e-05	TGFBR2;ACVR1C;CREBBP;SMAD5;ACVR2B;RBL2
	Prostate cancer	6	7.34298e-05	CHUK;PDPK1;PTEN;CREBBP;HSP90B1;TGFA
	Melanogenesis	6	0.000184974	ADCY1;KITLG;FZD5;FZD4;FZD7;CREBBP
	Neuroactive ligand-receptor interaction	6	0.0166689	PTGER4;CALCR;CNR1;ADRA2A;LPAR1;CALCRL
	Inositol phosphate metabolism	5	7.54215e-05	PIP4K2B;PIP5K3;IPPK;SYNJ1;PTEN
	Cholera - Infection	5	0.000105773	ATP6V1E1;TJP1;SLC12A2;TJP2;ATP6V1B2
	p53 signaling pathway	5	0.000222613	APAF1;RCHY1;FAS;CCNG1;PTEN
	Long-term potentiation	5	0.000328918	PPP1R12A;ADCY1;CREBBP;RAP1A;PPP1CB
	Chronic myeloid leukemia	5	0.000328918	TGFBR2;CHUK;STAT5B;ACVR1C;PTPN11
	Phosphatidylinositol signaling system	5	0.000349822	PIP4K2B;PIP5K3;IPPK;SYNJ1;PTEN
	ErbB signaling pathway	5	0.000651885	ERBB4;STAT5B;PAK2;PAK6;TGFA
	Apoptosis	5	0.000722953	APAF1;FAS;CHUK;CASP7;XIAP
	Leukocyte transendothelial migration	5	0.00282136	CXCL12;ITGAL;ACTN2;RAP1A;PTPN11
	Insulin signaling pathway	5	0.00493684	PPARGC1A;FAS;KIAA1303;PDPK1;PPP1CB

## Sheet: miR-24
GO	GO Term	Count	p-Value	Input Symbol
biological process	GO:0006355 regulation of transcription, DNA-dependent	27	6.28858e-29	JARID1A;SCML1;ZBTB44;ZNF654;LIMD1;ELL;RNF2;NFXL1;SCML2;BHLHB5;ZNF697;TRIB3;ZNF572;ZNF395;CITED4;RBBP4;MNT;KLF8;ZNF217;PER2;SUV420H2;ZXDA;DEDD;TAF7L;ZXDC;CREBL2;VGLL3
	GO:0006350 transcription	20	2.35651e-18	SCML1;ZBTB44;ZNF654;ELL;RNF2;PURA;ZNF697;ARID5B;TRIB3;ZNF572;ZNF395;RBBP4;TCF7;KLF8;PER2;SUV420H2;ZXDA;TAF7L;ZXDC;CREBL2
	GO:0007165 signal transduction	13	2.57248e-08	LIMD1;PDGFRB;FGF11;S1PR1;APPL2;TSHR;NRP1;PER2;ACVR1B;ARHGAP26;DLC1;PTGER4;CREBL2
	GO:0006468 protein amino acid phosphorylation	11	5.35965e-14	TAOK1;PRKCH;ALS2CR2;TRIB3;ERBB3;MAST3;MARK4;PXK;NEK4;LIMK2;PIM2
	GO:0007155 cell adhesion	10	6.06572e-12	SIRPA;GNE;NFASC;NRP2;NRP2;APBA1;NRP1;NRP1;PTPRF;LAMC1
	GO:0007275 development	10	3.23741e-07	JARID1A;LIMD1;NRP2;MBNL3;FZD5;FBXW4;MNT;NRP1;TAF7L;SEMA4B
	GO:0007399 nervous system development	9	3.25452e-10	NRP2;FGF11;PURA;MARK4;APBA1;NRP1;NRP1;ARHGAP26;SEMA4B
	GO:0006917 induction of apoptosis	8	2.73013e-13	BCL2L11;BNIP3L;CDKN1B;NAIF1;TNFRSF19;ACVR1B;DLC1;DEDD
	GO:0008285 negative regulation of cell proliferation	8	1.6795e-12	SSTR1;CDKN1B;PTHLH;RBBP4;MNT;SESN1;DLC1;DLC1
	GO:0007267 cell-cell signaling	7	2.34942e-08	SSTR1;PTHLH;FGF11;STC2;TSHR;NRP1;DLGAP4
	GO:0008284 positive regulation of cell proliferation	6	9.08598e-09	PDGFRB;PTHLH;PURA;TSHR;NRP1;SSR1
	GO:0007049 cell cycle	6	4.32806e-06	CDKN1B;ALS2CR2;RBBP4;APPL2;NEK4;H2AFX
	GO:0007283 spermatogenesis	5	1.48442e-07	ABCB9;LIMK2;DEDD;TAF7L;H2AFX
	GO:0019941 modification-dependent protein catabolism	5	8.02685e-06	VCPIP1;RNF2;RNF138;ATG4A;KLHL3
	GO:0008283 cell proliferation	5	7.22219e-05	CDV3;INSIG1;APPL2;hCG_1757335;PIM2
	GO:0007186 G-protein coupled receptor protein signaling pathway	5	0.000177285	CALCR;FZD5;S1PR1;APPL2;PTGER4
	GO:0030154 cell differentiation	5	0.000464671	SCML1;NRP2;NRP1;TAF7L;SEMA4B
cellular component	GO:0005634 nucleus	53	6.82775e-55	JARID1A;SCML1;SCML1;TOP1;ZBTB44;ZNF654;BNIP3L;CDKN1B;ELL;NAIF1;RNF2;C5orf20;MBD6;NFXL1;ALS2CR2;PTHLH;SCML2;MBNL3;PURA;BHLHB5;HNF1B;ZNF697;ARID5B;TRIB3;ZNF572;ZNF395;CITED4;RBBP4;APPL2;APPL2;KIAA2018;MNT;NEK4;LIMK2;TCF7;PIM2;KLF8;ZNF217;PER2;SECISBP2;SESN1;MIDN;SUV420H2;ZXDA;DLC1;DEDD;CCT3;TAF7L;ZXDC;H2AFX;CREBL2;ABHD2;VGLL3
	GO:0016021 integral to membrane	46	9.52699e-44	TMEM50B;SIRPA;SNN;REEP2;ABCB9;B3GALT5;BNIP3L;BVES;DNAJB12;PDGFRB;KIAA0152;SLC19A2;NFXL1;NFASC;NRP2;LMBR1L;HEG1;MGAT4A;PTGFRN;TMEM161B;TSPAN14;INSIG1;S1PR1;NDST1;APPL2;TNFRSF19;TMEM9;TMEM165;NRP1;ERGIC1;STX6;CACNA1E;CMTM4;AGPAT9;GRIA3;SFXN5;MIA3;PAQR3;ATP1B2;LL22NC03-75B3.6;PTGER4;SEMA4B;PLEKHH2;ATP13A2;ABHD2;SSR1
	GO:0016020 membrane	46	4.3027e-38	SNN;SLC12A6;REEP2;ABCB9;B3GALT5;BNIP3L;BVES;DNAJB12;KCTD21;PDGFRB;KIAA0152;NFXL1;PTPRD;HEG1;MGAT4A;PTGFRN;TMEM161B;HIP1R;TSPAN14;INSIG1;NDST1;APPL2;TNFRSF19;VTI1A;TMEM9;TMEM165;KIAA2018;ERGIC1;CMTM4;PLOD2;AGPAT9;SFXN5;DLGAP4;MIA3;ACVR1B;CRAT;PAQR3;ATP1B2;LL22NC03-75B3.6;SBF2;SEMA4B;PTPRF;PLEKHH2;ATP13A2;ABHD2;SSR1
	GO:0005737 cytoplasm	40	5.46139e-31	JARID1A;CDV3;VCPIP1;BCL2L11;TOP1;GNE;CDKN1B;TAOK1;ATG4A;SLC19A2;ALS2CR2;PTHLH;SNTB1;MBNL3;PURA;KLHL1;ZNF395;HIP1R;CITED4;APPL2;PLCL2;RAP1B;hCG_1757335;PXK;KLHL3;LIMK2;PIM2;PER2;PADI1;ARHGAP26;DLC1;DLC1;DLC1;DEDD;CCT3;SBF2;TAF7L;PLEKHH2;LAMC1;ABHD2
	GO:0005886 plasma membrane	28	2.55564e-25	CALCR;TMEM50B;BCL2L11;SIRPA;SSTR1;SLC19A2;NFASC;SNTB1;NRP2;LMBR1L;FZD5;ERBB3;SLC16A2;S1PR1;APPL2;TSHR;RAP1B;hCG_1757335;PXK;NRP1;STX6;CACNA1E;RAP1A;GRIA3;DLC1;CCT3;PTGER4;LAMC1
	GO:0005622 intracellular	18	4.89548e-06	JARID1A;ZBTB44;ZNF654;RNF138;PTHLH;ZNF697;ARID5B;ZNF572;ZNF395;RAP1B;hCG_1757335;RAP1A;KLF8;ZNF217;ARHGAP26;ZXDA;DLC1;ZXDC
	GO:0005783 endoplasmic reticulum	15	6.54133e-19	TMEM50B;VCPIP1;ABCB9;B3GALT5;BNIP3L;DNAJB12;KIAA0152;PTGFRN;INSIG1;ERGIC1;PLOD2;AGPAT9;CRAT;LAMC1;SSR1
	GO:0005576 extracellular region	11	6.31589e-09	ELL;PTHLH;NRP2;HEG1;ERBB3;MGAT4A;STC2;NRP1;NRP1;ADAMTS14;LAMC1
	GO:0005794 Golgi apparatus	10	1.27398e-11	VCPIP1;B3GALT5;MBNL3;FZD5;MGAT4A;PTGFRN;NDST1;ERGIC1;STX6;PAQR3
	GO:0005887 integral to plasma membrane	10	3.51168e-10	CALCR;SLC12A6;SSTR1;PTPRD;FZD5;ERBB3;SLC16A2;TSHR;ACVR1B;PTPRF
	GO:0005856 cytoskeleton	9	1.2289e-08	GNE;NEFM;SNTB1;KLHL1;KLHL3;ARHGAP26;DLC1;CCT3;PLEKHH2
	GO:0005789 endoplasmic reticulum membrane	7	1.07e-08	ABCB9;KIAA0152;PTGFRN;INSIG1;ERGIC1;AGPAT9;SSR1
	GO:0005829 cytosol	7	4.14863e-07	BCL2L11;CDKN1B;ATG4A;MTHFR;RAP1A;DLC1;TRPC4AP
	GO:0000139 Golgi membrane	6	3.43985e-08	B3GALT5;FZD5;NDST1;ERGIC1;STX6;PAQR3
	GO:0005730 nucleolus	6	2.31617e-07	TOP1;MBNL3;HNF1B;DEDD;TAF7L;ABHD2
	GO:0005624 membrane fraction	6	6.8968e-07	SLC12A6;SSTR1;NRP2;SLC16A2;STX6;DLC1
	GO:0005739 mitochondrion	6	1.15635e-05	BCL2L11;BNIP3L;TNFRSF19;LIMK2;SFXN5;CRAT
molecular function	GO:0005515 protein binding	53	1.02896e-46	JARID1A;BCL2L11;TOP1;ZBTB44;LIMD1;CDKN1B;ELL;ELL;RNF2;RAB3IL1;KCTD21;RNF138;ATG4A;MTHFR;NFXL1;NFASC;NRP2;RNF165;TRIB3;KLHL1;FZD5;MAST3;PTGFRN;SNX13;HIP1R;INSIG1;MARK4;RBBP4;APPL2;TNFRSF19;hCG_1757335;APBA1;PXK;NRP1;ERGIC1;MGC16385;KLHL3;LIMK2;TCF7;PIM2;PLOD2;RAP1A;PER2;DLGAP4;MIA3;ARHGAP26;DLC1;ATP1B2;DEDD;SBF2;PTPRF;LAMC1;H2AFX
	GO:0046872 metal ion binding	23	6.4512e-18	JARID1A;ZBTB44;ZNF654;LIMD1;RNF2;RNF138;PRKCH;NFXL1;RNF165;MBNL3;ZNF697;ZNF572;MGAT4A;ZNF395;LIMK2;PLOD2;KLF8;ZNF217;ZXDA;LIMD2;ADAMTS14;ZXDC;SMYD5
	GO:0000166 nucleotide binding	21	9.32413e-22	ABCB9;GNE;TAOK1;PDGFRB;ATAD2B;PRKCH;ALS2CR2;ERBB3;GK5;MAST3;MARK4;RAP1B;hCG_1757335;PXK;NEK4;LIMK2;PIM2;RAP1A;ACVR1B;CCT3;ATP13A2
	GO:0008270 zinc ion binding	21	1.35024e-20	JARID1A;ZBTB44;ZNF654;LIMD1;RNF2;RNF138;PRKCH;NFXL1;RNF165;MBNL3;ZNF697;ZNF572;ZNF395;LIMK2;KLF8;ZNF217;ZXDA;LIMD2;ADAMTS14;ZXDC;SMYD5
	GO:0005524 ATP binding	20	5.79651e-24	ABCB9;GNE;TAOK1;PDGFRB;ATAD2B;PRKCH;ALS2CR2;TRIB3;ERBB3;GK5;MAST3;MARK4;PXK;NEK4;LIMK2;PIM2;ACVR1B;CCT3;TRPC4AP;ATP13A2
	GO:0016740 transferase activity	16	2.34027e-16	GNE;TAOK1;PDGFRB;PRKCH;ERBB3;GK5;MAST3;MARK4;NDST1;NEK4;LIMK2;PIM2;AGPAT9;ACVR1B;CRAT;SUV420H2
	GO:0004872 receptor activity	15	7.43809e-15	SSTR1;PDGFRB;PTPRD;NRP2;LMBR1L;S1PR1;TNFRSF19;TSHR;NRP1;GRIA3;ACVR1B;PAQR3;PTGER4;SEMA4B;PTPRF
	GO:0003677 DNA binding	12	1.65419e-09	ZBTB44;ZNF654;MBD6;ZNF697;ARID5B;ZNF572;ZNF395;APPL2;KIAA2018;TCF7;KLF8;DEDD
	GO:0005509 calcium ion binding	10	3.27641e-11	PTHLH;SNTB1;NRP2;HEG1;PLCL2;KIAA2018;NRP1;CACNA1E;PADI1;SSR1
	GO:0003700 transcription factor activity	8	2.11917e-08	JARID1A;SCML1;NFXL1;SCML2;HNF1B;MNT;ZNF217;CREBL2
	GO:0004674 protein serine/threonine kinase activity	7	1.6932e-09	TAOK1;MAST3;MARK4;NEK4;LIMK2;PIM2;ACVR1B
	GO:0016787 hydrolase activity	6	0.000752127	PTPRD;NDST1;PADI1;PTPRF;ATP13A2;ABHD2
	GO:0003779 actin binding	5	4.86748e-07	SNTB1;KLHL1;HIP1R;PXK;KLHL3
KEGG	Pathway	Count	p-Value	Input Symbol
	MAPK signaling pathway	8	2.56962e-07	TAOK1;PDGFRB;FGF11;RAP1B;hCG_1757335;CACNA1E;RAP1A;ACVR1B
	Neuroactive ligand-receptor interaction	6	2.91234e-05	CALCR;SSTR1;S1PR1;TSHR;GRIA3;PTGER4
	Focal adhesion	5	0.000114837	PDGFRB;RAP1B;hCG_1757335;RAP1A;LAMC1
	Colorectal cancer	4	4.36781e-05	PDGFRB;FZD5;TCF7;ACVR1B
	Renal cell carcinoma	3	0.000597266	RAP1B;hCG_1757335;RAP1A
	Chronic myeloid leukemia	3	0.00070096	CDKN1B;GAB2;ACVR1B
	Long-term potentiation	3	0.00070096	RAP1B;hCG_1757335;RAP1A
	Adherens junction	3	0.000815467	TCF7;ACVR1B;PTPRF
	Prostate cancer	3	0.00111484	CDKN1B;PDGFRB;TCF7
	Leukocyte transendothelial migration	3	0.00277014	RAP1B;hCG_1757335;RAP1A
	Axon guidance	3	0.00339059	NRP1;LIMK2;SEMA4B
	Calcium signaling pathway	3	0.00885646	PDGFRB;ERBB3;CACNA1E
	Regulation of actin cytoskeleton	3	0.0139666	PDGFRB;FGF11;LIMK2
	Cytokine-cytokine receptor interaction	3	0.0226178	PDGFRB;TNFRSF19;ACVR1B
	SNARE interactions in vesicular transport	2	0.00346703	VTI1A;STX6
	Lysine degradation	2	0.00616742	PLOD2;SUV420H2
	Basal cell carcinoma	2	0.00714063	FZD5;TCF7
	Acute myeloid leukemia	2	0.00817859	TCF7;PIM2
	Melanoma	2	0.0116687	PDGFRB;FGF11
	Small cell lung cancer	2	0.0167856	CDKN1B;LAMC1
	ErbB signaling pathway	2	0.0171552	CDKN1B;ERBB3
	Melanogenesis	2	0.0239526	FZD5;TCF7
	Cell adhesion molecules (CAMs)	2	0.0381321	NFASC;PTPRF
	Wnt signaling pathway	2	0.0478319	FZD5;TCF7

## Sheet: miR-27ab
GO	GO Term	Count	p-Value	Input Symbol
biological process	GO:0006355 regulation of transcription, DNA-dependent	145	3.9248e-144	ONECUT2;EYA4;AFF4;ZBTB34;LIN28B;SOX11;RUNX1;C10orf137;EYA1;MIER3;RCBTB1;HOXA13;CCNK;ZNF800;NCOA7;KLF3;HOXB8;CREB1;HOXA10;NR2F6;TEAD1;RS1;RARA;BTG2;SMAD5;NR5A2;NR2F2;IKZF2;IRF4;RCOR3;NR1D2;ZFHX3;MLL3;IKZF1;RNF141;OPA1;TMEM189-UBE2V1;UBE2V1;CNOT7;E2F7;TSC22D2;ZNF783;PPARA;EN2;ISL1;BCL3;SATB2;NLK;ERG;GZF1;FOXN4;FOXP2;GATA2;BMI1;EBF3;FOXO1;FOSB;PDE8B;NRBF2;GATA3;OTX2;PLAG1;LBH;NCOA5;FOXP4;RYBP;MIER2;…
	GO:0006350 transcription	119	3.81184e-103	EYA4;AFF4;ZBTB34;HIPK2;SOX11;C10orf137;EYA1;MIER3;RCBTB1;CCNK;ZNF800;NCOA7;KLF3;HOXA10;NR2F6;TEAD1;RS1;RARA;BTG2;SMAD5;NR2F2;NR2F2;IKZF2;RCOR3;NR1D2;MLL3;IKZF1;OPA1;BRWD1;CNOT7;ZNF783;CTCF;MED14;ERG;POLR3G;C1orf83;GZF1;FOXN4;FOXP2;GATA2;BMI1;HNF4G;FOXO1;TFAP2B;NRBF2;GATA3;PLAG1;LBH;NCOA5;FOXP4;RYBP;MIER2;AXUD1;KHSRP;KLF12;RXRA;MET;ARID2;NRIP2;CDYL;ZZZ3;JMJD1C;HIVEP2;ZNF148;ELL2;INSM2;CNOT1;SFRS8;…
	GO:0007165 signal transduction	85	4.07126e-50	MAP2K4;SOS1;ABL2;CDS1;GRIN2D;PDE7B;SFRP1;PDK4;ADORA2B;PTGDR;PTGER3;SRGAP2;SRGAP2;CREB1;PRKAA2;NR2F6;P2RY5;LIMK1;RARA;INPP1;SMAD5;NR2F2;NR2F2;CNTNAP2;OPHN1;P11;HBEGF;DTNA;CNOT7;ABBA-1;NGFR;ANK2;RAP2B;ERG;PLXND1;GNG12;EDNRA;AGRN;FRS3;PCTK3;DLL4;FGF1;PLAA;RPS6KB1;CNR1;NCOA1;PTCH1;PDE3B;TXNDC1;PDE3A;RET;PDK1;CD2AP;NF1;SMOC2;GNB4;ANK1;MAP2K7;NFAT5;HUNK;GABRB3;SHB;LEP;EDAR;GTF2I;SRGAP3;SRGAP3;GNA13;IRS…
	GO:0007275 development	79	6.43204e-57	EYA4;RUNX1;EYA1;SEMA6A;HRB;SFRP1;HOXA13;CSRP2;KLF3;HOXB8;HOXA10;RELN;RS1;ZMYM4;SPRY2;BMP3;VANGL1;QKI;TAPT1;FAM65B;SNF1LK;EFNB2;DKK2;AIDA;EN2;NGFR;SEMA6D;ISL1;DCX;ERG;PLXND1;PDPN;NRP2;EBF3;FOSB;SHROOM2;OTX2;LBH;RYBP;DLL4;FGF1;ARX;MET;NEUROD4;RNF111;ID3;HOXC6;GREM1;FZD4;VANGL2;HIC1;SPATA2;HUNK;SHB;EHF;HOXB3;FZD7;C1GALT1;STRBP;EDAR;WNT3A;MYT1;LRP6;AGGF1;PHC2;SNAI1;MNT;HLX;EVI5;DVL2;MDGA1;PAX9;VEGFC;…
	GO:0006468 protein amino acid phosphorylation	49	5.76733e-52	PLK2;ACVR1C;PRKY;MAP2K4;PRKX;NRK;HIPK2;CSNK1G1;CDS1;STYK1;CREB1;PRKAA2;LIMK1;NEK6;SNF1LK;STK39;TLK2;ERG;BRSK1;TAOK1;CDC42BPB;PCTK3;RPS6KB1;RET;MAPKAPK3;EPHB2;MAP2K7;LIMK2;HUNK;PAK6;WNK1;CDK6;MAPK14;SGK269;PAN3;MYT1;CDK8;BMPR1A;AAK1;MAP3K14;STK10;PKN2;GRK6;PRKCD;ACVR2A;PIK3CD;STK40;ACVR2B;PRKCH
	GO:0030154 cell differentiation	39	4.2947e-27	ACVR1C;SEMA6A;HRB;SFRP1;CSRP2;BMP3;QKI;FAM65B;TMEM189-UBE2V1;UBE2V1;EFNB2;NGFR;SEMA6D;DCX;PEG10;NRP2;DLL4;FGF1;CSF1;ARX;PAPPA;MDFI;SPATA2;CBFA2T3;SHB;C1GALT1;STRBP;EID1;EDAR;GNA13;MYT1;BHLHB3;BMPR1A;HLX;MDGA1;NHS;VEGFC;NARG1;SEMA7A;HIP1
	GO:0007155 cell adhesion	35	9.85595e-31	STAB2;ABL2;RELN;RS1;CNTNAP2;ITGA2;COL21A1;FLRT3;PDPN;NRP2;NRP2;NCAM1;CDH5;HAPLN1;FBLN5;NLGN4X;CNR1;NFASC;NEO1;ITGA5;ARF6;PRR3;BCAN;COL5A1;COL11A2;F3;FLRT2;AGGF1;CDH24;APC;PTPRT;PXN;PIK3CD;KITLG;SSX2IP
	GO:0045944 positive regulation of transcription from RNA polymerase II promoter	28	3.4164e-36	ONECUT2;RUNX1;HOXA13;TEAD1;BMP3;OPA1;CNOT7;POU2F3;PPARA;ISL1;BCL3;MED14;FOXO1;AGRN;AXUD1;CBFB;KLF12;RXRA;NCOA1;THRB;MED13;NFAT5;SMAD2;PLAGL2;CRTC1;SOX8;IGF1;PAX9
	GO:0007399 nervous system development	27	2.29757e-20	SLC1A2;SOX11;SEMA6A;ATXN10;LIMK1;NR2F2;OPHN1;EFNB2;SEMA6D;NRP2;TFAP2B;ARX;CNR1;NEUROD4;APAF1;GREM1;CHERP;EPHB2;APBA2;MEF2C;DYRK1A;MYT1;CHRM1;IGF1;MDGA1;NR2C2;SEMA7A
	GO:0006811 ion transport	26	1.2725e-20	GRIA4;KCNK2;SLC39A11;AQP11;GABRP;GRIN2D;ATP6V1A;GLRA2;KCNJ1;CACNA1A;CLCN5;SLC5A3;GRIA3;GRIK3;ATP5G3;STIM2;CACNB2;GABRB3;WNK1;SLC12A2;SLC10A7;LASP1;SCN3B;ACCN2;SLC39A13;SLC38A4
	GO:0007049 cell cycle	26	9.88497e-19	PDS5B;CDS1;RCBTB1;CCNK;PARD6B;NEK6;SNF1LK;TLK2;E2F7;PPP1CC;EBF3;STAG1;CD2AP;GSPT2;CALM3;CDK6;EID1;RBBP4;MYT1;URG4;E2F6;POLS;EVI5;FOXN3;CCNG1;SMPD3
	GO:0006508 proteolysis	24	7.17855e-15	USP25;NPEPPS;NPEPPS;P11;BACE1;TMPRSS7;PEG10;ADAMTS10;UBE2N;CPD;ADAMTS5;PAPPA;NRIP2;CLPP;ENPEP;ADAM19;CAPN7;SOLH;WDR7;ADAMTS6;SENP1;MMP13;ECE2;ST14
	GO:0007242 intracellular signaling cascade	23	9.44611e-11	WSB1;PLCL2;PLCH1;MLL3;TLK2;DCX;VAV2;UNC13C;RGS6;CDC42BPB;ADCY6;DEPDC1B;PDK1;PDPK1;MAPKAPK3;SOCS6;SMAD2;SOCS4;SOCS4;PRKCD;DVL2;RASSF5;SHC4;PRKCH;STAC
	GO:0006810 transport	23	2.86937e-06	SLC7A11;SLC1A2;ABCA1;SLC25A25;HRB;SLC35F1;SLC16A10;QKI;NDUFS4;KHSRP;TMED5;SLCO5A1;TXNDC1;SYT1;SLC35F4;SLC35F3;MFSD2;CASC3;ZNF238;NXF1;GJA5;SLC25A44;PITPNM2
	GO:0019941 modification-dependent protein catabolism	22	1.46707e-18	FBXW7;WSB1;FBXO10;FBXO45;NEDD4;RNF139;TMEM189-UBE2V1;UBE2V1;XIAP;FBXO33;UBE2N;RNF144A;ARX;RNF111;CBLB;SOCS6;NFX1;SENP1;UBE2W;SOCS4;SOCS4;KCMF1;ZRANB1;FBXO46
	GO:0006915 apoptosis	20	1.27465e-12	HIPK2;ARHGEF6;SEMA6A;NEK6;C8orf4;BAG2;OPA1;NGFR;PEG10;RYBP;AXUD1;NTN1;MET;SGPP1;ARF6;SHB;LITAF;EDAR;RASSF5;ECE1
	GO:0015031 protein transport	19	1.20406e-12	GORASP1;ARF3;NECAP1;LIN7C;VPS26B;NXT2;ABCB9;NUP210;RAB14;APBA2;SERP1;NUP153;ARF6;RAB20;RAB11FIP1;FAM125B;SNX18;RAB11FIP2;POM121C;POM121
	GO:0000122 negative regulation of transcription from RNA polymerase II promoter	17	1.06306e-20	PKIA;NR2F2;ZFHX3;CTCF;FOSB;RYBP;KLF12;ID3;NRIP2;MEIS2;MDFI;ZNF148;SUZ12;ZNF238;EID1;NFX1;E2F6
	GO:0044419 interspecies interaction between organisms	17	4.89626e-17	TNPO1;MAGI3;GRB2;CREB1;EFNB2;KPNB1;RNGTT;LDLR;RXRA;VAPB;ITGA5;NFX1;NXF1;CRTC1;TBP;SP1;XPO1
	GO:0007264 small GTPase mediated signal transduction	17	9.86378e-14	TRIM23;RBJ;ARF3;RAP2B;hCG_1757335;RAP1B;ARL4C;PDK1;RAB14;ARF6;RAB20;CDC42;RALGPS1;DIRAS1;RUNDC3A;RIT1;VAV3
	GO:0008283 cell proliferation	17	8.85982e-10	EIF5A2;CSRP2;ERG;MYH10;hCG_1757335;EDNRA;FGF1;UBR5;PTCH1;TXNDC1;ENPEP;CBFA2T3;EHF;BHLHB3;CDC27;EVI5;CDK5R1
	GO:0016568 chromatin modification	15	8.02307e-17	RCBTB1;MLL3;TLK2;MSL-1;BMI1;DOT1L;ARID2;JMJD1C;SUZ12;CHD7;RUVBL2;BCORL1;NPTXR;SUV420H1;JMJD2B
	GO:0007186 G-protein coupled receptor protein signaling pathway	15	5.04437e-07	KCNK2;ABCA1;ADORA2B;PTGDR;PTGER3;P2RY5;GNG12;EDNRA;FZD4;CALM3;FZD7;GNA13;GIPC1;INSR;OPN5
	GO:0009952 anterior/posterior pattern formation	14	5.54352e-20	GRSF1;HOXB8;BTG2;HOXC6;HOXB3;SMAD2;TGFBR1;APC;BMPR1A;ACVR2A;HOXA5;ACVR2B;HOXC11;HTT
	GO:0009887 organ morphogenesis	14	6.02257e-10	SEMA6A;HOXA13;CSRP2;SPRY2;ITGA2;EFNB2;PDGFRA;PTCH1;THRB;EPHB2;BHLHB3;IGF1;VEGFC;HTT
	GO:0007420 brain development	13	1.72131e-14	RELN;CA10;NDUFS4;DCX;MYH10;SHROOM2;MET;NF1;TBR1;ECE2;MDGA1;CDK5R1;HTT
	GO:0005975 carbohydrate metabolism	13	5.06638e-09	GALNT7;PDK4;B4GALT3;CNOT7;NLK;PPP1CC;MAN2A1;MAN2A2;PDK1;GPD1L;PGM2L1;FUT9;INSR
	GO:0055114 oxidation reduction	13	2.41936e-08	KIAA1576;PDIA5;ALDH4A1;GPD2;HMGCR;JMJD1C;GPD1L;CYP1B1;GFOD1;ASPH;PXN;JMJD2B;ZADH2
	GO:0007411 axon guidance	12	4.05404e-18	SEMA6A;RELN;OPHN1;NGFR;NRP2;MYH10;OTX2;ARX;NTN1;EPHB2;CDK5R1;SEMA3B
	GO:0007605 sensory perception of sound	12	8.80342e-15	EYA4;KRAS;EYA1;SPRY2;OPA1;GATA3;THRB;KIAA1199;CHD7;COL11A2;IGF1;IGF1
	GO:0006511 ubiquitin-dependent protein catabolism	12	2.49935e-12	USP42;PSMA1;USP25;UBE2D1;USP46;UBE2NL;UBR5;UBR1;USP45;UBE4A;USP31;USP31
	GO:0007283 spermatogenesis	12	7.88388e-12	HRB;EIF5A2;TEGT;HOXA10;ABCB9;CDYL;SPATA2;LIMK2;STRBP;ACVR2A;MYCBP;HTT
	GO:0051301 cell division	12	1.2537e-11	PDS5B;CCNK;PARD6B;NEK6;PPP1CC;EBF3;STAG1;CD2AP;CDK6;POLS;EVI5;CCNG1
	GO:0007267 cell-cell signaling	12	2.16183e-07	GRB2;SPRY2;BMP3;EFNB2;ENPEP;DLGAP3;WNT3A;IL10;ECE2;EFNA3;PTPRJ;SEMA3B
	GO:0006397 mRNA processing	11	1.79769e-09	CUGBP2;QKI;AICDA;SFRS2IP;PRPF19;KHSRP;SFRS8;SRRM2;CSDC2;TARDBP;SFRS12IP1
	GO:0006974 response to DNA damage stimulus	11	3.31943e-09	CDS1;JMY;BTG2;TLK2;BCL3;UBE2N;BRSK1;UBR5;PRPF19;APC;ATRX
	GO:0006886 intracellular protein transport	11	2.68704e-08	AP1GBP1;APPBP2;KPNA3;STX16;STX6;SEC24A;KPNA6;PGAP1;STX5;STX1A;XPO1
	GO:0006357 regulation of transcription from RNA polymerase II promoter	11	5.89392e-07	JMY;NR2F2;BRWD1;HNF4G;TFAP2B;HOXC6;LITAF;CDC14B;SOX7;SP7;PKNOX2
	GO:0006629 lipid metabolism	11	1.58451e-05	CDS1;PLCL2;ASAH1;NR2F2;LPIN1;LDLR;CHKA;PDE3A;PPAP2B;LEP;SGMS1
	GO:0006464 protein modification	11	0.00278187	ABL2;USP25;NEDD4;TMUB1;UBR5;ARX;YES1;RPN2;CHRM1;UBFD1;USP31
	GO:0001764 neuron migration	10	4.31483e-17	RELN;NR2F2;DCX;MYH10;ARX;NTN1;MET;NEUROD4;MDGA1;CDK5R1
	GO:0006917 induction of apoptosis	10	1.02705e-09	JMY;NGFR;C16orf5;BBC3;PLAGL2;BCLAF1;BAK1;BAK1;HTT;HIP1
	GO:0030036 actin cytoskeleton organization and biogenesis	10	1.62993e-09	FGD6;KRAS;LIMK1;OPHN1;MYH10;PDK1;ADD1;PDPK1;NF1;TMSB10;CDC42
	GO:0007268 synaptic transmission	10	8.97644e-09	SLC6A1;SNAP25;SLC1A2;PDE7B;NOVA1;UNC13C;SYT1;APBA2;STX1A;GIPC1
	GO:0008380 RNA splicing	10	9.28347e-09	NOVA1;QKI;SFRS2IP;PRPF19;KHSRP;SFRS1;SFRS8;SRRM2;TARDBP;SFRS12IP1
cellular component	GO:0005634 nucleus	330	0	DCUN1D4;PDS5B;ONECUT2;FBXW7;EYA4;PHLPPL;AFF4;ZBTB34;CDR2;LIN28B;KIAA2018;TNPO1;HIPK2;MBTD1;SOX11;USP42;RUNX1;TRIM23;MAGI3;CDS1;C10orf137;EYA1;MIER3;HRB;RCBTB1;OBFC2A;RBBP5;HOXA13;NOVA1;ZHX1;TFPI;ZNF800;CSRP2;NCOA7;JMY;PSMA1;KLF3;APPBP2;HOXB8;CREB1;TEGT;HOXA10;PKIA;PRKAA2;NR2F6;LIMK1;CUGBP2;TEAD1;NPEPPS;NEK6;RS1;RARA;ZMYM4;BTG2;CCNJ;DCP1A;SMAD5;NR5A2;NR2F2;NR2F2;IKZF2;RSBN1L;IRF4;RCOR3;QKI;NR1D2;T…
	GO:0005737 cytoplasm	260	6.3921e-207	GCC2;RGPD5;FGD6;EYA4;PHLPPL;CDR2;AP1GBP1;LIN28B;TNPO1;HIPK2;SOX11;FAM126A;TRIM2;USP42;RPGRIP1L;CSNK1G1;GRSF1;TRIM23;GCA;ABL2;ARHGEF6;EIF5;AQP11;EYA1;RCBTB1;TSC1;FBXO10;ITSN2;PLCL2;EPB41L4A;TFPI;PSMA1;B4GALT3;ATXN10;NEDD4;PARD6B;APPBP2;PKIA;RELN;LIMK1;CUGBP2;PLCH1;NPEPPS;NEK6;SPRY2;DCP1A;SMAD5;PANK1;RC3H1;IRF4;RCOR3;QKI;GFPT2;TNRC6B;AICDA;OPHN1;P11;P11;UAP1;FAM65B;SNF1LK;STK39;ACTA2;DTNA;BRWD1;TME…
	GO:0016020 membrane	192	9.30519e-125	GLT8D3;ACVR1C;ST6GALNAC3;GCC2;GPAM;PHLPPL;AP1GBP1;SFXN2;SLC7A11;PCNX;ALG9;TMEM170B;KIAA2018;KCNK2;SLC39A11;FAM126A;ABCA1;SLITRK1;TRIM23;GALNT7;GALNT7;SLC25A25;AQP11;CDS1;MMD;SEMA6A;EDEM3;TSC1;GORASP1;C1orf9;SLC35F1;B4GALT3;APPBP2;PELI2;TEGT;PLCH1;SFXN4;KCNJ1;VANGL1;RNF139;PAQR9;ICHTHYIN;CNTNAP2;TAPT1;TMCC1;TMUB1;PIP5K1B;OPA1;NDUFS4;HEG1;TMEM189-UBE2V1;UBE2V1;RGS17;NKTR;LPCAT1;FLRT3;BACE1;GLTP;EFH…
	GO:0016021 integral to membrane	179	2.29585e-132	GLT8D3;ACVR1C;ST6GALNAC3;GPAM;GRIA4;SFXN2;SLC7A11;PCNX;SLC1A2;ALG9;TMEM170B;KCNK2;SLC39A11;SLC9A4;SLITRK1;GALNT7;GALNT7;SLC25A25;AQP11;CDS1;GABRP;GRIN2D;STYK1;SEMA6A;C1orf9;CDH11;SLC35F1;PTGDR;B4GALT3;P2RY5;SFXN4;KCNJ1;SLC16A10;NKAIN1;SMAD5;VANGL1;RNF139;PAQR9;ICHTHYIN;CNTNAP2;TAPT1;TMCC1;ITGA2;TMUB1;OPA1;HEG1;TMEM189-UBE2V1;UBE2V1;LPCAT1;GPR126;SEMA6D;LPHN2;TMPRSS7;CACNA1A;EFHA2;STX16;PLXND1;C18…
	GO:0005886 plasma membrane	147	6.7479e-120	SLC6A1;SNAP25;GRIA4;SOS1;SLC9A4;LIFR;STAB2;KRAS;GCA;MAGI3;GABRP;GRIN2D;PALM2;STYK1;ADORA2B;CDH11;TFPI;PTGDR;NEDD4;GLRA2;PARD6B;PTGER3;P2RY5;RS1;SLC16A10;NKAIN1;SPRY2;CHIC1;OPHN1;P11;ITGA2;ATP2B1;HBEGF;EFNB2;AIDA;NGFR;GPR126;SEMA6D;LPL;NECAP1;LPHN2;EPB41;FNBP1;TMPRSS7;CACNA1A;RAP2B;LIN7C;PLXND1;PDPN;UNC13C;C18orf1;NRP2;MYH10;MAGI2;NCAM1;GNG12;CDH5;SHROOM2;STX6;hCG_1757335;EDNRA;GRIA3;LDLR;STAG1;GR…
	GO:0005622 intracellular	110	5.02507e-31	MAP3K7IP3;FGD6;ZBTB34;TRIM2;ARFGEF1;SOS1;TRIM23;KRAS;ARHGEF6;WSB1;ITSN2;ZHX1;ZNF800;NCOA7;KLF3;NEDD4;SRGAP2;SRGAP2;ARF3;SMAD5;IKZF2;OPHN1;ZFHX3;IKZF1;XIAP;ZNF783;CTCF;ZFP106;RAP2B;PLXND1;VAV2;GZF1;FOXP2;NXT2;TBC1D4;PLAG1;hCG_1757335;FOXP4;RYBP;UBR5;RNASEN;KLF12;RAP1B;TRIM46;DEPDC1B;ARL4C;ARID2;EEPD1;GSPT1;JMJD1C;ZFHX4;NF1;APAF1;HIVEP2;ZNF148;INSM2;CHERP;RAB14;ZKSCAN2;HIC1;ZBTB39;SUZ12;ZNF238;NUP1…
	GO:0005576 extracellular region	63	7.90591e-44	LIFR;SFRP1;TFPI;RELN;RS1;ADAMTSL3;BMP3;P11;MATN3;RSPO3;HBEGF;HEG1;DKK2;COL21A1;LPL;GDF6;ADAMTS10;NRP2;NCAM1;HAPLN1;LBH;FBLN5;AGRN;SEPN1;ICOS;ADAMTS5;FGF1;CSF1;NTN1;PAPPA;FBLN2;PRRG1;C6orf120;SMOC2;GREM1;BCAN;GFOD1;COL5A1;LEP;OLFM3;ADAMTS6;COL11A2;ADAMTSL1;WNT3A;MMP13;IL10;AGGF1;PXN;GALNT1;TMEM25;IGF1;IGF1;SP1;SP1;STX1A;ANTXR2;ST3GAL2;KITLG;C2CD2;VEGFC;ST14;FAM172A;SEMA3B
	GO:0005829 cytosol	58	1.3002e-57	GPAM;SOS1;EIF5;GRB2;TSC1;GORASP1;EIF5A2;PSMA1;NEDD4;PELI2;UBE2D1;PRKAA2;NPEPPS;SPRY2;SMAD5;PANK1;XIAP;KPNB1;LPL;ZFP106;MAP1B;VPS26B;YWHAB;HMGCS1;RPS6KB1;RPN1;PDK1;ADD1;PDPK1;APAF1;PPAP2B;MAPKAPK3;RAB14;ACLY;CALM3;EIF2S2;RPN2;ZFP36;MAPT;CDC42;SMAD2;PDLIM5;RUVBL2;MAPK14;MAP3K12;FNDC3A;SDPR;NCALD;APC;PPP3R1;CDC27;PRKCD;GIPC1;C2CD2;PPARG;CD28;INSR;AGPAT3;XPO1
	GO:0005794 Golgi apparatus	57	2.8754e-59	ST6GALNAC3;GCC2;FGD6;AP1GBP1;TRIM23;GALNT7;GALNT7;GRB2;GORASP1;B4GALT3;RS1;ARF3;KIAA1012;TNRC6B;LPCAT1;BACE1;CLCN5;STX16;STX6;RNF144A;PTGFRN;SH3RF1;MAN2A1;MAN2A2;RET;VAPB;SLC35A3;ST3GAL6;SEC24A;ZNF148;PPAP2B;ITGA5;ZC3H12B;FREQ;MANEAL;GOLGA1;CBFA2T3;ARF6;RAB20;LITAF;CHST1;SGMS1;OSBPL10;MYT1;ECE2;CSDC2;STX5;GALNT1;PIK3CD;FUT9;ECE1;ST3GAL2;GOLM1;TGOLN2;HTT;SMPD3;HIP1
	GO:0005887 integral to plasma membrane	49	8.65716e-41	SLC6A1;ABCA1;LIFR;STAB2;MMD;ATP6V1A;ADORA2B;GLRA2;PTGER3;TEGT;ATP2B1;HBEGF;EFNB2;NGFR;FLRT3;BACE1;CLCN5;PDPN;SLC5A3;PDGFRA;EDNRA;LDLR;GRIK3;NLGN4X;ICOS;CNR1;CNR1;PTCH1;MET;PRRG1;NEO1;ENPEP;CACNB2;SLC6A6;GABRB3;FLRT2;SLC12A2;CHRM1;ACVR2A;EFNA3;ACCN2;ACVR2B;GOLM1;CD28;RAPGEF2;PHB;ST14;HTT;PTPRJ
	GO:0005783 endoplasmic reticulum	48	5.72031e-45	ALG9;AQP11;CDS1;EDEM3;KTELC1;TEGT;GLT25D2;RNF139;PDIA5;TMEM189-UBE2V1;UBE2V1;LPCAT1;PTGFRN;SEPN1;TMED5;TXNDC1;RPN1;HMGCR;VAPB;ABCB9;SEC24A;SGPP1;CYP1B1;NUP210;TMTC2;DNAJB9;STIM2;ZC3H12B;CHERP;SERP1;RPN2;HYOU1;ASPH;SGMS1;FNDC3A;MYT1;KDELC2;SURF4;PGAP1;STX5;G6PC3;LASS6;PIK3CD;SV2A;ANTXR2;AGPAT3;POM121C;POM121;FAM172A;SEMA3B
	GO:0005739 mitochondrion	36	1.32035e-27	GPAM;SFXN2;SLC25A25;WSB1;ATP6V1A;PDK4;SFXN4;PDHX;P11;ALDH4A1;FAM65B;ZFHX3;OPA1;NDUFS4;GPD2;PPP1CC;CLCN5;AK2;PPIF;ATP5G3;PDK1;CBLB;CLPP;LIMK2;BCAN;FRMD6;CAPRIN2;BBC3;ATPAF1;PISD;MYCBP;SLC25A44;PITPNM2;PNKD;PHB;BAK1
	GO:0030054 cell junction	34	1.61369e-36	SNAP25;GRIA4;MAGI3;GABRP;GRIN2D;GLRA2;PARD6B;DTNA;COLQ;AIDA;LIN7C;UNC13C;MAGI2;CDH5;AMOTL1;GRIA3;ENAH;GRIK3;CPD;RPS6KB1;SYT1;GABRB3;DLGAP3;ERC2;GJA5;PXN;CHRM1;PIK3CD;SV2A;RIMS4;SHC4;SSX2IP;PTPRJ;SHANK3
	GO:0005624 membrane fraction	30	3.95396e-27	SLC6A1;SLC1A2;ABCA1;KRAS;MMD;TSC1;NEDD4;RS1;STK39;ZFP106;NRP2;CDH5;STX6;CPD;PPIF;MET;TXNDC1;YES1;SGPP1;RAB14;ARF6;PDLIM5;MAP3K12;F3;MYT1;SLC12A2;CHRM1;GIPC1;ECE1;HIP1
	GO:0005856 cytoskeleton	29	1.01306e-17	FGD6;ABL2;PLEKHH1;EPB41L4A;APPBP2;FAM65B;ANK2;DCX;FNBP1;CALD1;SHROOM2;CDC42BPB;ENAH;PLEKHH2;ADD1;TMSB10;CABP1;FRMD6;MAPT;EPB41L1;ERC2;ELMOD1;WIPF2;PXN;LASP1;PTPN3;KITLG;AFAP1;HIP1
	GO:0045202 synapse	28	9.89562e-35	SNAP25;GRIA4;SLC1A2;GABRP;GRIN2D;GLRA2;DTNA;COLQ;AIDA;PPP1CC;LIN7C;UNC13C;MAGI2;GRIA3;ENAH;GRIK3;CPD;RPS6KB1;SYT1;GABRB3;DLGAP3;ERC2;CHRM1;PIK3CD;SV2A;RIMS4;SHC4;SHANK3
	GO:0005730 nucleolus	26	3.39263e-24	SOX11;USP42;NOVA1;RCOR3;OPA1;CLCN5;GATA2;HNF4G;MEIS2;ZFHX4;CD2AP;ZNF148;DNAJB9;NOL4;ATF3;TMEM123;BCAN;REPS2;OSBPL10;STX5;HLX;ABHD2;SP1;NFIB;STK40;NR2C2
	GO:0005789 endoplasmic reticulum membrane	25	2.04648e-22	CDS1;RNF139;TMEM189-UBE2V1;UBE2V1;LPCAT1;PTGFRN;SEPN1;TMED5;TXNDC1;HMGCR;VAPB;ABCB9;SEC24A;SGPP1;CYP1B1;NUP210;STIM2;SERP1;ASPH;MYT1;SURF4;G6PC3;LASS6;PIK3CD;ANTXR2;POM121C;POM121
	GO:0000139 Golgi membrane	24	5.87439e-25	ST6GALNAC3;GCC2;TRIM23;GALNT7;GALNT7;LPCAT1;CLCN5;STX16;STX6;MAN2A1;MAN2A2;SLC35A3;ST3GAL6;SEC24A;MANEAL;CBFA2T3;CHST1;SGMS1;MYT1;ECE2;STX5;PIK3CD;MAPK8IP3;SMPD3
	GO:0005615 extracellular space	20	3.5734e-16	SFRP1;RELN;RS1;BMP3;P11;HBEGF;COLQ;DKK2;LPL;NLK;GDF6;FGF1;CSF1;GREM1;LEP;WNT3A;MMP13;IL10;KITLG;VEGFC
	GO:0005578 extracellular matrix (sensu Metazoa)	19	6.18174e-20	RELN;ADAMTSL3;MATN3;COL21A1;FLRT3;ADAMTS10;HAPLN1;FBLN5;AGRN;ADAMTS5;FGF1;NTN1;FBLN2;BCAN;ADAMTS6;ADAMTSL1;WNT3A;FLRT2;MMP13
	GO:0005654 nucleoplasm	17	3.14691e-11	CREB1;UBE2D1;PRKAA2;SMAD5;KPNB1;RNGTT;RYBP;MET;NUP153;SMAD2;MAPK14;MYT1;CDC27;TBP;RPS6KA5;PHB;XPO1
	GO:0045211 postsynaptic membrane	15	1.71729e-20	GRIA4;GABRP;GRIN2D;GLRA2;AIDA;LIN7C;GRIA3;GRIK3;CPD;GABRB3;DLGAP3;CHRM1;PIK3CD;SHC4;SHANK3
	GO:0005813 centrosome	12	6.52362e-13	RPGRIP1L;CEP135;TNRC6B;OPA1;YWHAB;MARCKS;CALM3;LITAF;APC;PISD;CDC27;EVI5
	GO:0005874 microtubule	11	9.94397e-11	APPBP2;SPRY2;MAP1B;KIF3A;EBF3;SHROOM2;EML1;MAPT;KIF21B;RASSF5;RASSF5
	GO:0031410 cytoplasmic vesicle	11	3.42189e-07	HRB;CHIC1;NECAP1;FNBP1;SYT1;ENPEP;RAB11FIP1;UQCC;FNDC3A;SV2A;HIP1
	GO:0005643 nuclear pore	10	9.69326e-15	TNPO1;HRB;KPNA3;KPNB1;NUP210;KPNA6;NUP153;NXF1;POM121C;POM121;XPO1
	GO:0048471 perinuclear region	10	4.57447e-13	ATXN10;NEDD4;YWHAB;STX6;CSF1;CD2AP;RAB14;AGGF1;GALNT1;ECE1
	GO:0005625 soluble fraction	10	5.01221e-10	PKIA;HMGCS1;FBLN5;UBR5;CTDSP2;PDE3A;LIMK2;GIPC1;STAC;HTT
	GO:0005768 endosome	10	2.83951e-09	MMD;BACE1;CLCN5;LDLR;EHD3;ARF6;FAM125B;RAB11FIP2;ECE1;INSR
molecular function	GO:0005515 protein binding	318	1.61361e-278	PLK2;MAP3K7IP3;FBXW7;FGD6;PHLPPL;SNAP25;MAP2K4;ZBTB34;CDR2;JHDM1D;TNPO1;HIPK2;TRIM2;SOS1;SLITRK1;RUNX1;UNKL;TRIM23;STAB2;GNS;KRAS;ABL2;MAGI3;CDS1;GRIN2D;SEMA6A;HRB;RCBTB1;RBBP5;WSB1;SFRP1;C5orf41;FBXO10;HOXA13;GORASP1;ITSN2;ZHX1;CCNK;EIF5A2;CDH11;NCOA7;JMY;PSMA1;LONRF1;ATXN10;PARD6B;SS18L1;PELI2;RAD9B;PRKAA2;RELN;LIMK1;CUGBP2;TEAD1;NPEPPS;NEK6;RS1;RS1;RARA;BTG2;SPRY2;DCP1A;SMAD5;RC3H1;VANGL1;NR5A…
	GO:0008270 zinc ion binding	162	2.17124e-170	MAP3K7IP3;FGD6;ZBTB34;LIN28B;JHDM1D;MBTD1;SLC39A11;TRIM2;UNKL;TRIM23;HRB;ZHX1;ZNF800;CSRP2;LONRF1;KLF3;NR2F6;RELN;LIMK1;NPEPPS;NPEPPS;RARA;ADAMTSL3;ZMYM4;KIAA1576;RC3H1;NR5A2;NR2F2;NR2F2;RNF139;IKZF2;NR1D2;AICDA;ZFHX3;MLL3;IKZF1;RNF141;DTNA;ING5;XIAP;BRPF3;PPARA;KPNB1;CTCF;ISL1;ZFP106;PEG10;VAV2;GZF1;ADAMTS10;UNC13C;FOXP2;GATA2;BMI1;RNF182;HNF4G;EBF3;TET1;RNF144A;GATA3;ANKIB1;PLAG1;ZCCHC24;FOXP4;…
	GO:0046872 metal ion binding	155	3.94322e-122	MAP3K7IP3;FGD6;PHLPPL;ZBTB34;LIN28B;JHDM1D;MBTD1;TRIM2;UNKL;TRIM23;HRB;ZHX1;ZNF800;CSRP2;LONRF1;KLF3;B4GALT3;NR2F6;LIMK1;NPEPPS;NPEPPS;RARA;ZMYM4;RC3H1;NR5A2;NR2F2;NR2F2;RNF139;IKZF2;NR1D2;AICDA;ZFHX3;MLL3;IKZF1;RNF141;ING5;XIAP;BRPF3;PPARA;CTCF;ISL1;ZFP106;PPP1CC;PEG10;DCP2;VAV2;GZF1;ADAMTS10;UNC13C;FOXP2;GATA2;BMI1;RNF182;HNF4G;EBF3;TET1;RNF144A;GATA3;ANKIB1;PLAG1;ZCCHC24;FOXP4;RYBP;MTMR4;CPD;A…
	GO:0000166 nucleotide binding	117	1.59984e-112	PLK2;ACVR1C;PRKY;MAP2K4;PRKX;NRK;HIPK2;ABCA1;CSNK1G1;TRIM23;KRAS;ABL2;EIF5;MAGI3;CDS1;STYK1;ATP6V1A;RBJ;PRKAA2;LIMK1;CUGBP2;NEK6;KCNJ1;ARF3;PANK1;TNRC6B;ATP2B1;SNF1LK;STK39;ACTA2;TLK2;OPA1;MAP3K4;NLK;RAP2B;KIF3A;MYH10;BRSK1;HNRNPF;PDGFRA;HCN4;TAOK1;hCG_1757335;CDC42BPB;AK2;PCTK3;ARX;RAP1B;CPEB4;RPS6KB1;SFRS1;MET;MET;RBPMS2;ARL4C;RET;PDK1;CBLB;ABCB9;YES1;RBM12B;GSPT1;EHD3;PDPK1;APAF1;GSPT2;MAPKAPK…
	GO:0005524 ATP binding	90	8.65647e-93	PLK2;ACVR1C;PDS5B;PRKY;MAP2K4;PRKX;NRK;HIPK2;ABCA1;RUNX1;CSNK1G1;ABL2;MAGI3;CDS1;STYK1;ATP6V1A;PDK4;PRKAA2;LIMK1;NEK6;KCNJ1;PANK1;ATP2B1;SNF1LK;STK39;ACTA2;TLK2;MAP3K4;NLK;KIF3A;MYH10;BRSK1;PDGFRA;TAOK1;NCOA5;CDC42BPB;AK2;PCTK3;ARX;RPS6KB1;MET;RET;PDK1;PDK1;CBLB;ABCB9;YES1;EHD3;PDPK1;APAF1;MAPKAPK3;EPHB2;ACLY;MAP2K7;LIMK2;HUNK;PAK6;NAV2;HYOU1;WNK1;CHD7;DYRK1A;CDK6;ATP10B;RUVBL2;MAPK14;CAMK2D;SGK2…
	GO:0016740 transferase activity	89	1.02177e-82	PLK2;ACVR1C;GPAM;PRKY;MAP2K4;PRKX;NRK;HIPK2;CSNK1G1;ABL2;CDS1;STYK1;PDK4;PRKAA2;LIMK1;NEK6;PANK1;GFPT2;UAP1;SNF1LK;STK39;MLL3;TLK2;PIP5K1B;LPCAT1;RNGTT;MAP3K4;NLK;MEPCE;BRSK1;HMGCS1;PDGFRA;TAOK1;CDC42BPB;AK2;PCTK3;RPS6KB1;NCOA1;CHKA;DOT1L;MET;MET;RPN1;RET;PDK1;PDK1;CBLB;YES1;CDYL;PDPK1;MAPKAPK3;EPHB2;ACLY;MAP2K7;LIMK2;HUNK;PAK6;RPN2;CHST1;WNK1;PGM2L1;DYRK1A;CDK6;SGMS1;MAPK14;CAMK2D;SGK269;MAP3K12…
	GO:0003700 transcription factor activity	84	7.09951e-97	ONECUT2;AFF4;NRK;RUNX1;HOXA13;ZHX1;KLF3;HOXB8;CREB1;HOXA10;NR2F6;TEAD1;RARA;SMAD5;NR2F2;NR2F2;IRF4;NR1D2;CNOT7;E2F7;POU2F3;TSC22D2;PPARA;CTCF;EN2;ISL1;BCL3;SATB2;ERG;FOXN4;FOXP2;GATA2;HNF4G;FOXO1;FOSB;TFAP2B;GATA3;OTX2;PLAG1;FOXP4;AXUD1;CBFB;ARX;KLF12;RXRA;THRB;MEIS2;HOXC6;ZFHX4;TBR1;ZKSCAN2;HIC1;ZNF238;CBFA2T3;ATF3;NFAT5;MEF2C;EHF;HOXB3;CDC14B;SOX7;EGR3;SOLH;SMAD2;GTF2I;NFX1;PRDM16;MYT1;PLAGL2;B…
	GO:0005509 calcium ion binding	63	1.75861e-65	AP1GBP1;KIAA2018;GNS;GCA;GALNT7;GALNT7;SLC25A25;GRIN2D;EDEM3;ITSN2;PLCL2;CDH11;RELN;PLCH1;P11;ITGA2;ATP2B1;DTNA;HEG1;SRL;GPD2;LPCAT1;LPL;CACNA1A;EFHA2;NRP2;CDH5;FBLN5;LDLR;DLL4;CNR1;EML1;FBLN2;PRRG1;RET;CBLB;EHD3;SYT1;SMOC2;ENPEP;ITGA5;STIM2;FREQ;CACNB2;CALM3;CABP1;CABP1;ASPH;REPS2;NPTXR;MMP13;CDH24;CDH24;NCALD;PPP3R1;PXN;GALNT1;PIK3CD;ACCN2;PITPNM2;REPS1;RAPGEF2;CDK5R1
	GO:0003677 DNA binding	63	5.14028e-41	PDS5B;ZBTB34;LIN28B;KIAA2018;SOX11;SOS1;TNRC18;MIER3;HRB;ZNF800;ZMYM4;IKZF2;RCOR3;MLL3;IKZF1;RNF141;ZNF783;PEG10;C1orf83;GZF1;EBF3;TET1;RYBP;MIER2;PRPF19;KHSRP;NCOA1;DOT1L;NEUROD4;ARID2;ZZZ3;HIVEP2;ZNF148;INSM2;LOC440093;ZBTB39;NUP153;ZBTB10;LHFP;ZFP36;H3F3B;BAZ2B;CHD7;STRBP;SP6;ZNF385A;ZNF280C;PHC2;SNAI1;TOX;ZNF516;CSDC2;PATZ1;HIC2;BCLAF1;TBP;POLS;ZNF827;ATRX;SP7;BAHD1;PAX9;ZFAND3
	GO:0043565 sequence-specific DNA binding	49	1.79324e-57	ONECUT2;HOXA13;ZHX1;HOXB8;CREB1;HOXA10;NR2F6;RARA;NR5A2;NR2F2;NR2F2;NR1D2;ZFHX3;POU2F3;PPARA;EN2;ISL1;SATB2;ERG;FOXN4;FOXP2;GATA2;HNF4G;FOXO1;FOSB;TFAP2B;GATA3;OTX2;FOXP4;ARX;RXRA;THRB;EEPD1;MEIS2;HOXC6;ZFHX4;ATF3;MEF2C;EHF;HOXB3;HLX;LASS6;HOXA5;FOXN3;SP1;PKNOX2;PPARG;NR2C2;HOXC11
	GO:0016787 hydrolase activity	47	3.61228e-26	EYA4;PHLPPL;GNS;EYA1;PDE7B;ATP6V1A;ASAH1;FAM108C1;PLCH1;INPP1;DCP1A;AICDA;P11;ATP2B1;LPL;RNGTT;PPP1CC;DCP2;PDE8B;MTMR4;RNASEN;CTDSP2;PDE3B;PDE3A;DUSP5;SGPP1;PPAP2B;PPM1H;MANEAL;NAV2;CDC14B;CDC14B;CHD7;SYNJ1;ATP10B;RUVBL2;PTPRT;G6PC3;ABHD2;PPME1;ATRX;PRNPIP;PTPN3;PNKD;ATP11C;PTPRJ;SMPD3
	GO:0004872 receptor activity	44	3.83906e-28	ACVR1C;GRIA4;LIFR;STAB2;GRIN2D;MMD;SEMA6A;ADORA2B;PTGDR;P2RY5;RNF139;PAQR9;ICHTHYIN;TAPT1;ITGA2;HBEGF;OPA1;SEMA6D;MED14;PLXND1;NRP2;PDGFRA;EDNRA;GRIA3;GRIK3;CNR1;PTCH1;MET;RET;MED13;ITGA5;EPHB2;TMEM123;NPTXR;LRP6;TGFBR1;BMPR1A;PTPRT;CHRM1;ANTXR2;ACVR2B;INSR;SEMA7A;SEMA3B
	GO:0004674 protein serine/threonine kinase activity	37	4.99495e-43	PLK2;ACVR1C;PRKY;MAP2K4;PRKX;NRK;HIPK2;CSNK1G1;CDS1;PRKAA2;LIMK1;NEK6;SNF1LK;TLK2;MAP3K4;NLK;BRSK1;TAOK1;CDC42BPB;RPS6KB1;MAPKAPK3;MAP2K7;LIMK2;HUNK;PAK6;WNK1;DYRK1A;MAPK14;MAP3K12;MYT1;TGFBR1;BMPR1A;AAK1;MAP3K14;STK10;STK40;RPS6KA5
	GO:0000287 magnesium ion binding	32	6.70571e-35	ACVR1C;EYA4;ABL2;CDS1;CDS1;EYA1;GRIN2D;PRKAA2;NEK6;INPP1;ITGA2;ATP2B1;SNF1LK;OPA1;MAP3K4;NLK;PDE8B;BRSK1;CDC42BPB;ADCY6;ACLY;MAP2K7;C1GALT1;ATP10B;MAP3K12;TGFBR1;BMPR1A;ACVR2A;ACVR2B;RPS6KA5;ATP11C;SMPD3
	GO:0008233 peptidase activity	31	1.04614e-29	USP42;PSMA1;USP25;RELN;NPEPPS;NPEPPS;ADAMTSL3;P11;BACE1;TMPRSS7;USP46;ADAMTS10;CPD;ADAMTS5;PAPPA;CLPP;ENPEP;USP45;ADAM19;CAPN7;SOLH;ADAMTS6;ADAMTSL1;SENP1;MMP13;ECE2;ZRANB1;ECE1;USP31;USP31;ST14
	GO:0003723 RNA binding	31	4.43821e-27	HRB;NOVA1;PSMA1;CUGBP2;RC3H1;QKI;P11;SERBP1;DCP2;HNRNPF;LARP4;TROVE2;UBR5;KHSRP;CPEB4;SFRS1;MET;MET;RBM12B;SFRS8;CHERP;SRRM2;NOL4;CPEB3;EIF2S2;ELAVL2;SYNJ1;CSDC2;TARDBP;RALYL;XPO1
	GO:0004871 signal transducer activity	24	1.43884e-08	PLK2;FAM126A;PLCL2;PLCH1;NEK6;RGS17;CNOT7;ERG;GNG12;RGS6;PCTK3;NCOA1;CHKA;TMEM9B;RGS1;CBLB;GNB4;LITAF;GNA13;IRS1;WNT3A;GRK6;DVL2;RAPGEF2
	GO:0005525 GTP binding	22	1.15421e-22	TRIM23;KRAS;EIF5;RBJ;ARF3;OPA1;RAP2B;hCG_1757335;RAP1B;ARL4C;GSPT1;EHD3;GSPT2;RAB14;ARF6;RAB20;CDC42;GNA13;URG4;DIRAS1;INSR;RIT1
	GO:0042802 identical protein binding	19	6.37295e-16	PDS5B;GCC2;ITGA2;E2F7;LPL;FNBP1;PPP1CC;AMOTL1;SYT1;CASC3;ATF3;MAPT;RUVBL2;AMOTL2;PHC2;DVL2;KITLG;CD28;BAK1
	GO:0003779 actin binding	17	6.06615e-17	JMY;CNN3;OPHN1;ABBA-1;EPB41;MAP1B;CALD1;ENAH;CPD;TMSB10;EPB41L1;PDLIM5;WIPF2;NCALD;GIPC1;AFAP1;HIP1
	GO:0042803 protein homodimerization activity	15	9.34445e-16	FOXP2;PDGFRA;NLGN4X;CSF1;CHKA;THRB;VAPB;ADD1;GPD1L;PRR3;MAP3K12;BMPR1A;SP1;GIPC1;ECE1
	GO:0016874 ligase activity	15	2.73049e-13	NEDD4;UBE2D1;RNF139;XIAP;UBE2N;RNF144A;UBR5;ARX;SH3RF1;RNF111;CBLB;UBR1;NFX1;UBE2W;KCMF1
	GO:0003676 nucleic acid binding	15	0.0407354	OBFC2A;CNOT7;EIF2C2;ZCCHC24;RBPMS2;EHD3;TMEM123;PRR3;KIAA2022;AGGF1;JMJD2B;BCL11A;PRNPIP;RIT1;SFRS12IP1
	GO:0003714 transcription corepressor activity	14	8.76147e-19	HIPK2;NR2F2;CTCF;RYBP;KLF12;THRB;ID3;MEIS2;HOXC6;ATF3;EID1;MNT;E2F6;HTT
	GO:0030145 manganese ion binding	14	1.70926e-17	ACVR1C;PHLPPL;ABL2;GALNT7;GALNT7;B4GALT3;PPP1CC;DCP2;PDE8B;TGFBR1;BMPR1A;GALNT1;ACVR2A;ACVR2B
	GO:0016563 transcriptional activator activity	13	7.70189e-12	RUNX1;TEAD1;SMAD5;IRF4;TMEM189-UBE2V1;UBE2V1;CNOT7;PPARA;HNF4G;FOXO1;SMAD2;SP1;PPARG;PHB
	GO:0003707 steroid hormone receptor activity	12	1.52859e-20	NR2F6;RARA;NR5A2;NR2F2;NR2F2;NR1D2;PPARA;HNF4G;RXRA;THRB;PPARG;NR2C2
	GO:0003924 GTPase activity	12	4.00957e-13	TRIM23;EIF5;ARF3;OPA1;ARL4C;GSPT1;EHD3;GSPT2;RAB14;ARF6;CDC42;GNA13
	GO:0003702 RNA polymerase II transcription factor activity	12	1.62629e-12	ONECUT2;IRF4;CTCF;ISL1;CBFB;ELL2;NFAT5;MEF2C;LITAF;SOX8;SP1;HOXC11
	GO:0008134 transcription factor binding	12	5.43955e-09	IRF4;BCL3;NLK;GATA2;FOSB;GATA3;ARX;ID3;ADD1;MDFI;SMAD2;TBP
	GO:0004842 ubiquitin-protein ligase activity	11	1.1098e-13	TRIM23;FBXO10;NEDD4;UBE2D1;UBE2NL;UBE2N;UBR5;PRPF19;UBR1;UBE2W;ZRANB1
	GO:0005516 calmodulin binding	11	2.18864e-13	CNN3;ATP2B1;CALD1;MYH10;MARCKS;RGS1;ADD1;SYT1;CAMK2D;PPP3R1;RIT1
	GO:0003713 transcription coactivator activity	11	5.47255e-12	JMY;RARA;NR2F2;TFAP2B;CBFB;RXRA;NCOA1;MNT;MYCBP;SERTAD2;NR2C2
	GO:0008083 growth factor activity	11	6.16623e-12	BMP3;P11;HBEGF;NLK;GDF6;FGF1;LEP;IGF1;IGF1;KITLG;VEGFC
	GO:0005096 GTPase activator activity	11	6.89532e-11	ARHGEF6;SRGAP2;SRGAP2;OPHN1;TBC1D4;RGS6;DEPDC1B;RGS1;SRGAP3;SRGAP3;SYDE1;SIPA1L3;VAV3
	GO:0016491 oxidoreductase activity	11	3.11521e-06	KIAA1576;PDIA5;ALDH4A1;GPD2;HMGCR;JMJD1C;GFOD1;ASPH;PXN;JMJD2B;ZADH2
	GO:0004930 G-protein coupled receptor activity	11	3.6151e-05	ADORA2B;PTGDR;PTGER3;P2RY5;GPR126;LPHN2;EDNRA;FZD4;FZD7;CHRM1;OPN5
	GO:0005215 transporter activity	11	0.000514477	AQP11;SLC5A3;SLCO5A1;ATP5G3;ABCB9;SYT1;NUP153;SLC12A2;SLC25A44;SV2A;HTT
	GO:0017124 SH3 domain binding	10	9.08409e-14	SOS1;QKI;ABBA-1;ZFP106;ENAH;SH3BGRL2;CD2AP;ADAM19;MAPT;SHANK3
KEGG	Pathway	Count	p-Value	Input Symbol
	MAPK signaling pathway	32	1.54995e-20	ACVR1C;PRKY;MAP2K4;PRKX;SOS1;KRAS;GRB2;MAP3K4;NLK;CACNA1A;GNG12;PDGFRA;TAOK1;hCG_1757335;FGF1;RAP1B;DUSP5;NF1;MAPKAPK3;CACNB2;MAP2K7;MEF2C;MAPT;CDC42;MAPK14;MAP3K12;TGFBR1;PPP3R1;MAP3K14;MAPK8IP3;RPS6KA5;RAPGEF2
	Focal adhesion	23	8.61827e-15	SOS1;GRB2;RELN;ITGA2;XIAP;PPP1CC;VAV2;PDGFRA;hCG_1757335;RAP1B;MET;PDK1;PDPK1;ITGA5;PAK6;COL5A1;COL11A2;CDC42;PXN;IGF1;PIK3CD;SHC4;VEGFC;VAV3
	Regulation of actin cytoskeleton	23	3.26595e-14	SOS1;KRAS;ARHGEF6;LIMK1;ITGA2;PIP5K1B;PPP1CC;VAV2;MYH10;GNG12;PDGFRA;ENAH;FGF1;ITGA5;LIMK2;PAK6;CDC42;GNA13;APC;PXN;CHRM1;PIK3CD;VAV3
	Insulin signaling pathway	20	3.39337e-15	PRKY;PRKX;SOS1;KRAS;GRB2;TSC1;PRKAA2;PPP1CC;FOXO1;RPS6KB1;PDE3B;PDE3A;PDK1;CBLB;PDPK1;CALM3;IRS1;SOCS4;PIK3CD;SHC4;INSR
	T cell receptor signaling pathway	18	7.77266e-15	SOS1;KRAS;GRB2;VAV2;ICOS;PDK1;CBLB;MAP2K7;NFAT5;PAK6;CDC42;MAPK14;IL10;PPP3R1;MAP3K14;PIK3CD;CD28;VAV3
	Axon guidance	18	1.83932e-13	KRAS;SEMA6A;SRGAP2;SRGAP2;LIMK1;EFNB2;SEMA6D;NTN1;MET;EPHB2;LIMK2;NFAT5;PAK6;CDC42;SRGAP3;SRGAP3;PPP3R1;EFNA3;SEMA7A;SEMA3B
	Wnt signaling pathway	18	2.81664e-12	PRKY;PRKX;SFRP1;VANGL1;DKK2;NLK;FZD4;VANGL2;NFAT5;PRICKLE2;FZD7;SMAD2;CAMK2D;WNT3A;LRP6;APC;PPP3R1;DVL2
	Neuroactive ligand-receptor interaction	16	4.48153e-07	GRIA4;GABRP;GRIN2D;ADORA2B;PTGDR;GLRA2;PTGER3;P2RY5;EDNRA;GRIA3;GRIK3;CNR1;THRB;GABRB3;LEP;CHRM1
	GnRH signaling pathway	15	1.58506e-11	PRKY;MAP2K4;PRKX;SOS1;KRAS;GRB2;HBEGF;MAP3K4;ADCY6;MAP2K7;CALM3;CDC42;MAPK14;CAMK2D;PRKCD
	Cytokine-cytokine receptor interaction	14	1.3989e-05	LIFR;NGFR;PDGFRA;CSF1;MET;LEP;EDAR;IL10;TGFBR1;BMPR1A;ACVR2A;ACVR2B;KITLG;VEGFC
	Colorectal cancer	13	1.00231e-10	ACVR1C;SOS1;KRAS;GRB2;PDGFRA;MET;FZD4;FZD7;SMAD2;TGFBR1;APC;PIK3CD;DVL2
	ErbB signaling pathway	13	1.58009e-10	MAP2K4;SOS1;KRAS;ABL2;GRB2;HBEGF;RPS6KB1;CBLB;MAP2K7;PAK6;CAMK2D;PIK3CD;SHC4
	Ubiquitin mediated proteolysis	13	5.34054e-08	FBXW7;NEDD4;UBE2D1;XIAP;UBE2NL;UBE2N;UBR5;PRPF19;ARX;CBLB;UBE4A;UBE2W;CDC27
	Calcium signaling pathway	13	1.37065e-06	PRKY;PRKX;GRIN2D;ADORA2B;PTGER3;ATP2B1;CACNA1A;PDGFRA;EDNRA;CALM3;CAMK2D;PPP3R1;CHRM1
	Adherens junction	12	6.59753e-10	ACVR1C;NLK;MET;YES1;PRR3;CDC42;SMAD2;TGFBR1;SNAI1;INSR;SSX2IP;PTPRJ
	Melanogenesis	12	1.64518e-08	PRKY;PRKX;KRAS;CREB1;ADCY6;FZD4;CALM3;FZD7;CAMK2D;WNT3A;DVL2;KITLG
	Tight junction	12	3.27843e-07	KRAS;MAGI3;PARD6B;EPB41;MYH10;MAGI2;AMOTL1;YES1;EPB41L1;CDC42;PRKCD;PRKCH
	Fc epsilon RI signaling pathway	11	8.80656e-09	MAP2K4;SOS1;KRAS;GRB2;VAV2;PDK1;MAP2K7;MAPK14;PRKCD;PIK3CD;VAV3
	TGF-beta signaling pathway	11	2.47847e-08	ACVR1C;SMAD5;GDF6;RPS6KB1;ID3;SMAD2;TGFBR1;BMPR1A;ACVR2A;SP1;ACVR2B
	Glioma	10	1.55953e-08	SOS1;KRAS;GRB2;PDGFRA;CALM3;CDK6;CAMK2D;IGF1;PIK3CD;SHC4
	Renal cell carcinoma	10	3.74397e-08	SOS1;KRAS;GRB2;hCG_1757335;RAP1B;MET;PAK6;CDC42;PIK3CD;VEGFC
	Chronic myeloid leukemia	10	6.40744e-08	ACVR1C;SOS1;RUNX1;KRAS;GRB2;CBLB;CDK6;TGFBR1;PIK3CD;SHC4
	Long-term potentiation	10	6.40744e-08	PRKY;PRKX;KRAS;GRIN2D;PPP1CC;hCG_1757335;RAP1B;CALM3;CAMK2D;PPP3R1
	Leukocyte transendothelial migration	10	5.65007e-06	VAV2;CDH5;hCG_1757335;RAP1B;CDC42;MAPK14;PXN;PIK3CD;RASSF5;VAV3
	Cell adhesion molecules (CAMs)	10	1.3951e-05	CNTNAP2;NCAM1;CDH5;NLGN4X;ICOS;NFASC;NEO1;PRR3;F3;CD28
	Alzheimer's disease	10	0.000147527	GRIN2D;NDUFS4;LPL;BACE1;ATP5G3;APAF1;CALM3;MAPT;PPP3R1;CDK5R1

## Sheet: The-common-targets
GO	GO Term	Count	p-Value	Input Symbol
biological process	GO:0006355 regulation of transcription, DNA-dependent	27	3.53843e-30	ZBTB44;ZNF654;ZNF697;ZNF395;VGLL3;ZBTB34;LIN28B;KLF3;SMAD5;SATB2;FOXP2;EBF3;MET;MEIS2;JMJD1C;ZFHX4;HIC1;ZNF238;CBFA2T3;MEF2C;BAZ2B;EGR3;ZNF280C;RBBP4;MNT;NFIB;PAX9
	GO:0006350 transcription	22	5.97266e-22	ZBTB44;ZNF654;ZNF697;ZNF395;ZBTB34;KLF3;SMAD5;BRWD1;CTCF;FOXP2;HNF4G;MET;JMJD1C;HIC1;ZNF238;CBFA2T3;MEF2C;BAZ2B;EGR3;ZNF280C;RBBP4;NFIB
	GO:0007275 development	15	2.78232e-13	FZD5;SEMA4B;KLF3;SPRY2;SEMA6D;NRP2;EBF3;SHROOM2;MET;FZD4;HIC1;SHB;FZD7;MNT;PAX9
	GO:0006468 protein amino acid phosphorylation	8	8.6322e-10	ACVR1C;NEK6;TAOK1;LIMK2;PAK6;WNK1;ACVR2B;PRKCH
	GO:0007165 signal transduction	8	0.000190943	PTGER4;SMAD5;RAP2B;CNR1;NCOA1;SHB;ACVR2B;KITLG
	GO:0007399 nervous system development	7	8.68876e-08	SEMA4B;SEMA6D;NRP2;CNR1;APAF1;MEF2C;DYRK1A
	GO:0030154 cell differentiation	7	2.04397e-06	SEMA4B;ACVR1C;SEMA6D;NRP2;MDFI;CBFA2T3;SHB
	GO:0007155 cell adhesion	6	1.22015e-06	NRP2;NRP2;NLGN4X;CNR1;NFASC;KITLG
	GO:0007186 G-protein coupled receptor protein signaling pathway	6	8.12034e-06	CALCR;FZD5;PTGER4;ABCA1;FZD4;FZD7
	GO:0000122 negative regulation of transcription from RNA polymerase II promoter	5	2.36448e-08	PKIA;CTCF;MEIS2;MDFI;ZNF238
	GO:0007049 cell cycle	5	4.0952e-05	PARD6B;NEK6;EBF3;RBBP4;CCNG1
	GO:0006508 proteolysis	5	9.7671e-05	NPEPPS;NPEPPS;CPD;ADAMTS5;ADAM19
	GO:0046777 protein amino acid autophosphorylation	4	1.55765e-08	MET;YES1;DYRK1A;MOBKL1A
	GO:0051301 cell division	4	5.23038e-06	PARD6B;NEK6;EBF3;CCNG1
	GO:0007264 small GTPase mediated signal transduction	4	6.67242e-05	RAP1A;RAP2B;hCG_1757335;RAP1B
	GO:0019941 modification-dependent protein catabolism	4	0.000107423	NEDD4;XIAP;FBXO33;SOCS6
	GO:0006811 ion transport	4	0.000293901	GRIA3;WNK1;SLC12A2;LASP1
	GO:0006915 apoptosis	4	0.000583655	ARHGEF6;NEK6;MET;SHB
	GO:0007242 intracellular signaling cascade	4	0.00424697	PLCL2;PDPK1;SOCS6;PRKCH
	GO:0008150 biological_process	4	0.874608	BRWD1;EBF3;WNK1;ABHD2
cellular component	GO:0005634 nucleus	61	1.06235e-70	TOP1;ZBTB44;ZNF654;BNIP3L;ZNF697;ZNF395;VGLL3;ZBTB34;LIN28B;KIAA2018;TNPO1;ZHX1;KLF3;PKIA;CUGBP2;NPEPPS;NEK6;SMAD5;TNRC6B;BRWD1;CTCF;SATB2;DCP2;FOXP2;HNF4G;EBF3;NLGN4X;CPD;ADAMTS5;NCOA1;MET;MET;DUSP5;MEIS2;JMJD1C;ZFHX4;MDFI;HIC1;NOL4;LIMK2;ZNF238;CBFA2T3;MEF2C;BAZ2B;EGR3;DYRK1A;ZNF280C;REPS2;NAP1L5;RBBP4;N4BP1;TOX;MNT;MOBKL1A;ABHD2;NFIB;CCNG1;PAX9;USP31;KIAA1737;POM121C
	GO:0005737 cytoplasm	51	1.40748e-47	TOP1;ZNF395;LIN28B;TNPO1;ARHGEF6;PLCL2;NEDD4;PARD6B;PKIA;CUGBP2;NPEPPS;NEK6;SPRY2;SMAD5;TNRC6B;BRWD1;XIAP;SEMA6D;DCP2;HNF4G;EBF3;SHROOM2;TAOK1;hCG_1757335;CPD;ADAMTS5;RAP1B;CCM2;PLEKHH2;MARCKS;YES1;MEIS2;SEC24A;ZFHX4;PDPK1;MDFI;APAF1;LIMK2;SHB;SOCS6;WNK1;SYNJ1;REPS2;LASP1;MOBKL1A;ABHD2;ACVR2B;KITLG;USP31;USP31;KIAA1737
	GO:0016021 integral to membrane	33	3.4147e-28	BNIP3L;AGPAT9;PTGER4;SEMA4B;GLT8D3;ACVR1C;SMAD5;HEG1;GPR126;SEMA6D;LPHN2;EFHA2;NRP2;STX6;PTGFRN;GRIA3;CPD;KIAA0644;TMED5;FAM134C;PLEKHH2;NFASC;LL22NC03-75B3.6;ABCB9;FZD4;ADAM19;FZD7;SNN;ABHD2;FUT9;KITLG;ATP11C;POM121C
	GO:0016020 membrane	31	5.76043e-22	BNIP3L;AGPAT9;SEMA4B;GLT8D3;ACVR1C;KIAA2018;ABCA1;HEG1;EFHA2;PTGFRN;NLGN4X;CPD;KIAA0644;TMED5;FAM134C;MET;PLEKHH2;MARCKS;PRRG1;LL22NC03-75B3.6;ABCB9;SEC24A;FZD4;CBFA2T3;ADAM19;SNN;SLC12A2;ABHD2;FUT9;ATP11C;POM121C
	GO:0005886 plasma membrane	29	5.83004e-28	CALCR;FZD5;RAP1A;PTGER4;NEDD4;PARD6B;SPRY2;GPR126;SEMA6D;LPHN2;RAP2B;NRP2;SHROOM2;STX6;hCG_1757335;GRIA3;CPD;ADAMTS5;RAP1B;CNR1;CNR1;NFASC;PDPK1;SHB;FZD7;RAB11FIP2;ACVR2B;KITLG;RAPGEF2
	GO:0005622 intracellular	27	1.89699e-13	ZBTB44;ZNF654;ZNF697;ZNF395;RAP1A;MAP3K7IP3;ZBTB34;ARHGEF6;ZHX1;KLF3;NEDD4;SMAD5;XIAP;CTCF;RAP2B;FOXP2;hCG_1757335;RAP1B;JMJD1C;ZFHX4;APAF1;HIC1;ZNF238;EGR3;ZNF280C;NFIB;RAPGEF2
	GO:0005887 integral to plasma membrane	11	5.51145e-12	CALCR;FZD5;ABCA1;NLGN4X;CNR1;CNR1;MET;PRRG1;SLC12A2;ACVR2B;RAPGEF2
	GO:0005624 membrane fraction	9	1.24218e-11	ABCA1;NEDD4;NRP2;STX6;CPD;PPIF;MET;YES1;SLC12A2
	GO:0005829 cytosol	9	4.18641e-10	RAP1A;NEDD4;UBE2D1;NPEPPS;SPRY2;SMAD5;XIAP;PDPK1;APAF1
	GO:0005730 nucleolus	8	1.01601e-10	TOP1;HNF4G;MEIS2;ZFHX4;NOL4;REPS2;ABHD2;NFIB
	GO:0005794 Golgi apparatus	7	9.12304e-08	FZD5;TNRC6B;STX6;PTGFRN;SEC24A;CBFA2T3;FUT9
	GO:0005783 endoplasmic reticulum	7	1.52434e-07	BNIP3L;AGPAT9;PTGFRN;TMED5;ABCB9;SEC24A;POM121C
	GO:0005789 endoplasmic reticulum membrane	6	1.68249e-07	AGPAT9;PTGFRN;TMED5;ABCB9;SEC24A;POM121C
	GO:0005576 extracellular region	5	0.00214106	HEG1;NRP2;ADAMTS5;PRRG1;KITLG
	GO:0000139 Golgi membrane	4	2.38096e-05	FZD5;STX6;SEC24A;CBFA2T3
	GO:0005654 nucleoplasm	4	0.000270213	TOP1;UBE2D1;SMAD5;MET
	GO:0005856 cytoskeleton	4	0.00222457	SHROOM2;PLEKHH2;LASP1;KITLG
	GO:0005923 tight junction	3	3.31752e-06	PARD6B;SHROOM2;AMOTL2
	GO:0005938 cell cortex	3	5.32087e-06	NEDD4;SHROOM2;MARCKS
	GO:0005874 microtubule	3	0.000157626	SPRY2;EBF3;SHROOM2
	GO:0030054 cell junction	3	0.00117829	PARD6B;GRIA3;CPD
	GO:0005739 mitochondrion	3	0.010287	BNIP3L;PPIF;LIMK2
molecular function	GO:0005515 protein binding	54	7.74148e-51	TOP1;ZBTB44;FZD5;RAP1A;MAP3K7IP3;ZBTB34;JHDM1D;TNPO1;ZHX1;PARD6B;CUGBP2;NPEPPS;NEK6;SPRY2;SMAD5;BRWD1;XIAP;CTCF;DCP2;NRP2;EBF3;EBF3;PTGFRN;hCG_1757335;KBTBD8;CPD;KIAA0644;CNR1;MET;CCM2;MFHAS1;NFASC;YES1;SEC24A;JMJD1C;PDPK1;APAF1;FZD4;HIC1;LIMK2;ZNF238;CBFA2T3;PAK6;SHB;SOCS6;BAZ2B;WNK1;REPS2;NAP1L5;RBBP4;RAB11FIP2;LASP1;MOBKL1A;RAPGEF2
	GO:0008270 zinc ion binding	33	6.78112e-40	ZBTB44;ZNF654;ZNF697;ZNF395;MAP3K7IP3;ZBTB34;LIN28B;JHDM1D;ZHX1;KLF3;NPEPPS;NPEPPS;XIAP;CTCF;FOXP2;HNF4G;EBF3;CPD;ADAMTS5;SEC24A;JMJD1C;ZFHX4;HIC1;LIMK2;ZNF238;CBFA2T3;ADAM19;BAZ2B;EGR3;ZNF280C;LASP1;MOBKL1A;PRKCH
	GO:0046872 metal ion binding	33	6.65105e-32	ZBTB44;ZNF654;ZNF697;ZNF395;MAP3K7IP3;ZBTB34;LIN28B;JHDM1D;ZHX1;KLF3;NPEPPS;NPEPPS;XIAP;CTCF;DCP2;FOXP2;HNF4G;EBF3;CPD;ADAMTS5;JMJD1C;ZFHX4;HIC1;LIMK2;ZNF238;CBFA2T3;ADAM19;BAZ2B;EGR3;ZNF280C;LASP1;MOBKL1A;PRKCH
	GO:0000166 nucleotide binding	27	7.10983e-32	RAP1A;ACVR1C;ABCA1;CUGBP2;NEK6;TNRC6B;RAP2B;TAOK1;hCG_1757335;RAP1B;CPEB4;MET;MET;RBPMS2;ABCB9;YES1;RBM12B;PDPK1;APAF1;LIMK2;PAK6;WNK1;DYRK1A;ACVR2B;ATP11C;RALYL;PRKCH
	GO:0003700 transcription factor activity	16	5.89804e-21	ZHX1;KLF3;SMAD5;CTCF;SATB2;FOXP2;HNF4G;MEIS2;ZFHX4;HIC1;ZNF238;CBFA2T3;MEF2C;EGR3;MNT;NFIB
	GO:0005524 ATP binding	16	1.39466e-18	ACVR1C;ABCA1;NEK6;TAOK1;MET;ABCB9;YES1;PDPK1;APAF1;LIMK2;PAK6;WNK1;DYRK1A;ACVR2B;ATP11C;PRKCH
	GO:0016740 transferase activity	15	1.16496e-15	AGPAT9;ACVR1C;NEK6;TAOK1;NCOA1;MET;MET;YES1;PDPK1;LIMK2;PAK6;WNK1;DYRK1A;ACVR2B;PRKCH
	GO:0003677 DNA binding	13	3.64223e-11	ZBTB44;ZNF654;ZNF697;ZNF395;ZBTB34;LIN28B;KIAA2018;EBF3;NCOA1;BAZ2B;ZNF280C;TOX;PAX9
	GO:0003723 RNA binding	9	3.06602e-11	CUGBP2;DCP2;CPEB4;MET;MET;RBM12B;NOL4;SYNJ1;RALYL
	GO:0005509 calcium ion binding	9	3.3118e-10	KIAA2018;PLCL2;HEG1;EFHA2;NRP2;CNR1;PRRG1;REPS2;RAPGEF2
	GO:0004872 receptor activity	9	6.70164e-08	PTGER4;SEMA4B;ACVR1C;SEMA6D;NRP2;GRIA3;CNR1;MET;ACVR2B
	GO:0004674 protein serine/threonine kinase activity	7	8.39806e-10	ACVR1C;NEK6;TAOK1;LIMK2;PAK6;WNK1;DYRK1A
	GO:0043565 sequence-specific DNA binding	7	4.35301e-09	ZHX1;SATB2;FOXP2;HNF4G;MEIS2;ZFHX4;MEF2C
	GO:0008233 peptidase activity	7	7.15483e-09	NPEPPS;NPEPPS;CPD;ADAMTS5;ADAM19;USP31;USP31
	GO:0004930 G-protein coupled receptor activity	6	2.29946e-06	FZD5;PTGER4;GPR126;LPHN2;FZD4;FZD7
	GO:0030528 transcription regulator activity	5	0.000381569	VGLL3;KIAA2018;BRWD1;EBF3;NCOA1
	GO:0016787 hydrolase activity	5	0.00293452	DCP2;DUSP5;SYNJ1;ABHD2;ATP11C
	GO:0005525 GTP binding	4	1.94667e-05	RAP1A;RAP2B;hCG_1757335;RAP1B
	GO:0000287 magnesium ion binding	4	4.03897e-05	ACVR1C;NEK6;ACVR2B;ATP11C
	GO:0004871 signal transducer activity	4	0.0140097	PLCL2;NEK6;NCOA1;RAPGEF2
	GO:0004926 non-G-protein coupled 7TM receptor activity	3	1.27468e-08	FZD5;FZD4;FZD7
	GO:0051015 actin filament binding	3	8.15776e-07	SHROOM2;MARCKS;LASP1
	GO:0003714 transcription corepressor activity	3	2.2025e-05	CTCF;MEIS2;MNT
	GO:0030145 manganese ion binding	3	4.07667e-05	ACVR1C;DCP2;ACVR2B
	GO:0008237 metallopeptidase activity	3	6.77409e-05	NPEPPS;NPEPPS;CPD
	GO:0019904 protein domain specific binding	3	0.00014805	NEDD4;RAP2B;SHROOM2
	GO:0042803 protein homodimerization activity	3	0.000184382	BNIP3L;FOXP2;NLGN4X
	GO:0016874 ligase activity	3	0.000573417	NEDD4;UBE2D1;XIAP
	GO:0003674 molecular_function	3	0.965012	SEC24A;WNK1;ABHD2
KEGG	Pathway	Count	p-Value	Input Symbol
	MAPK signaling pathway	8	1.62753e-07	RAP1A;ACVR1C;TAOK1;hCG_1757335;RAP1B;DUSP5;MEF2C;RAPGEF2
	Focal adhesion	7	3.40975e-07	RAP1A;XIAP;hCG_1757335;RAP1B;MET;PDPK1;PAK6
	Renal cell carcinoma	5	4.95111e-07	RAP1A;hCG_1757335;RAP1B;MET;PAK6
	Colorectal cancer	5	1.1482e-06	FZD5;ACVR1C;MET;FZD4;FZD7
	Axon guidance	5	9.84238e-06	SEMA4B;SEMA6D;MET;LIMK2;PAK6
	Melanogenesis	4	7.99679e-05	FZD5;FZD4;FZD7;KITLG
	Neuroactive ligand-receptor interaction	4	0.00236739	CALCR;PTGER4;GRIA3;CNR1
	Basal cell carcinoma	3	0.000236771	FZD5;FZD4;FZD7
	Long-term potentiation	3	0.000590638	RAP1A;hCG_1757335;RAP1B
	Adherens junction	3	0.00068739	ACVR1C;MET;YES1
	TGF-beta signaling pathway	3	0.000909914	ACVR1C;SMAD5;ACVR2B
	Leukocyte transendothelial migration	3	0.00234454	RAP1A;hCG_1757335;RAP1B
	Tight junction	3	0.00326128	PARD6B;YES1;PRKCH
	Ubiquitin mediated proteolysis	3	0.00346737	NEDD4;UBE2D1;XIAP
	Wnt signaling pathway	3	0.00445175	FZD5;FZD4;FZD7
	Regulation of actin cytoskeleton	3	0.0119302	ARHGEF6;LIMK2;PAK6
	Cytokine-cytokine receptor interaction	3	0.0193995	MET;ACVR2B;KITLG
	ABC transporters - General	2	0.00412318	ABCA1;ABCB9
	p53 signaling pathway	2	0.00987334	APAF1;CCNG1
	Pancreatic cancer	2	0.0109985	ACVR1C;ARHGEF6
	Small cell lung cancer	2	0.0150217	XIAP;APAF1
	Apoptosis	2	0.0160273	XIAP;APAF1
	Cell adhesion molecules (CAMs)	2	0.0342631	NLGN4X;NFASC
